# Supplementary material for: Comparative metabolomics reveals complex metabolic shifts associated with nitrogen-induced color development in mature pepper fruit
Source: Front Plant Sci. 2024 Feb 20;15:1319680. doi: 10.3389/fpls.2024.1319680 (PMC10912300; doi:10.3389/fpls.2024.1319680)
Supplement: Supplementary file 3 [file Table_1.xlsx]

## Sheet: Table S1
Table S1 Detailed information of fertilizer application (kg ha-1)
Treatment	Base fertilizer (26 May)			Flowering stage (22 June)			26 days after flowering (18 July)			45 days after flowering (10 August)			Total rate
	N	P2O5	K2O	N	P2O5	K2O	N	P2O5	K2O	N	P2O5	K2O	N	P2O5	K2O
N0	0	70	60	0	70	80	0	0	80	0	0	80	0	140	300
N250	100	70	60	50	70	80	50	0	80	50	0	80	250	140	300
N400	270	145	115	130	145	115	0	0	0	0	0	0	400	290	230
Note: fertilizers were applied in small holes near the plants

## Sheet: Table S2
Table S2 Soil mineral N level (top 20 cm layer) and pepper fruit nutrients content under different N application rates at mature red stage
Treatment	Soil NH4+-N (mg·kg-1)	Soil NO3--N (mg·kg-1)	Fruit N (g·kg-1)	Fruit P (g·kg-1)	Fruit K (g·kg-1)
N0	1.44±0.16 a	1.2±0.46 c	8.13±0.12 b	3.32±0.12 a	25.71±0.50 a
N250	1.50±0.16 a	11.72±1.83 b	12.19±0.39 a	3.37±0.16 a	24.17±0.62 a
N400	1.84±0.36 a	28.87±2.99 a	11.98±0.54 a	3.45±0.17 a	24.94±0.30 a
Note: values (mean ± SE, n = 4) followed by different lowercase letters indicate significant difference among three N treatments at P < 0.05 level (Duncan's test).

## Sheet: Table S3
Table S3 Validation parameters values determined for the selected compounds, lower limit of quantification (LLOQ) and upper limit of quantification (ULOQ) (expressed as mg mL−1), r (correlation coefficient), and Weighting (1/ x^2).
Compounds	Molecular weight	Formula	Class	LLOQ	ULOQ	Equation	r
α-carotene	536.438232	C40H56	carotenes	0.05	250	y = 3.46281e5 x + 1083.99781	0.99458
lycopene	536.4382	C40H56	carotenes	1	250	y = 1.17062e5 x - 569.47533	0.99160
γ-carotene	536.4382	C40H56	carotenes	0.5	250	y = 5.65435e5 x - 18140.05327	0.99127
β-carotene	536.4382	C40H56	carotenes	2	250	y = 6.91386e5 x - 1853.60233	0.99463
phytofluene	542.4852	C40H62	carotenes	0.1	25	y = 2.26494e5 x - 801.01114	0.99557
(E/Z)-phytoene	544.5008	C40H64	carotenes	0.5	250	y = 1.03263e5 x + 129.86713	0.99666
ε-carotene	536.438232	C40H56	carotenes	0.01	25	y = 1.21098e6 x - 1467.90989	0.99413
antheraxanthin	584.4229	C40H56O3	xanthophylls	0.05	125	y = 5.79200e5 x + 313.49695	0.99392
zeaxanthin	568.428	C40H56O2	xanthophylls	0.1	50	y = 2.99149e5 x - 731.12382	0.99176
violaxanthin	600.4179	C40H56O4	xanthophylls	0.1	100	y = 3.24166e6 x - 980.48623	0.99438
neoxanthin	600.4179	C40H56O4	xanthophylls	0.01	50	y = 1.62798e6 x - 189.25861	0.99367
lutein	568.428	C40H56O2	xanthophylls	2	250	y = 6.99352e5 x + 287.40613	0.99561
β-cryptoxanthin	552.4331	C40H56O	xanthophylls	0.1	250	y = 4.84221e5 x - 1428.27343	0.99271
8'-apo-beta-carotenal	416.638	C30H40O	xanthophylls	0.01	125	y = 2.27099e6 x - 3245.46221	0.99226
capsanthin	584.871	C40H56O3	xanthophylls	0.005	100	y = 3.28754e6 x - 7.92845e4	0.99208
α-cryptoxanthin	552.43	C40H56O	xanthophylls	0.05	50	y = 6.43021e5 x - 2554.69030	0.99154
capsorubin	600.42	C40H56O4	xanthophylls	0.005	125	y = 3.13133e6 x - 1466.66991	0.99315
canthaxanthin	564.8	C40H52O2	xanthophylls	0.005	100	y = 3.77304e7 x - 10.89173	0.99704
echinenone	550.9	C40H54O	xanthophylls	0.005	50	y = 1.69030e7 x + -1226.13336	0.99548
β-citraurin	432.6	C30H40O2	xanthophylls	0.01	100	y = 5.43472e6 x - 380.88748	0.99233

## Sheet: Table S4A
Table S4A. Potential significant differential metabolites between N0 and N250
Index	Q1 (Da)	Q3 (Da)	Molecular Weight (Da)	Formula	Ionization model	Compounds	Class I	Class II	N0-1	N0-2	N0-3	N0-4	N250-1	N250-2	N250-3	N250-4	VIP
Lmyn006227	269.05	151	270.053	C15H10O5	[M-H]-	Galangin (3,5,7-Trihydroxyflavone)	Flavonoids	Flavones	8471.1	8987.3	9196.7	9078.5	6345.6	6106	3465.5	7495.3	1.17664
MWSHY0069	301.07	286.05	300.063	C16H12O6	[M+H]+	Hispidulin (5,7,4'-Trihydroxy-6-methoxyflavone)	Flavonoids	Flavones	230530	254570	280270	166050	223070	401050	435970	410100	1.04049
MWSHY0009	301.07	286.05	300.063	C16H12O6	[M+H]+	Diosmetin (5,7,3'-Trihydroxy-4'-methoxyflavone)	Flavonoids	Flavones	211300	278260	244690	157420	222660	434910	448670	408210	1.09075
pmp000004	331.08	316.06	330.074	C17H14O7	[M+H]+	4',5,7-Trihydroxy-3',6-dimethoxyflavone (Jaceosidin)	Flavonoids	Flavones	9117.4	12772	8354.2	9791.1	23040	19055	22489	24840	1.46261
pmb3006	431.1	269.1	432.106	C21H20O10	[M-H]-	Apigenin-7-O-glucoside(Cosmosiin)	Flavonoids	Flavones	167620	105030	72628	257050	70183	68272	41237	76629	1.10831
mws0072	433.11	271.01	432.106	C21H20O10	[M+H]+	Apigenin-5-O-glucoside	Flavonoids	Flavones	584450	840170	627360	1058800	285240	407390	310820	478650	1.30722
Lmlp005572	433.11	271.06	432.106	C21H20O10	[M+H]+	Galangin-7-O-glucoside	Flavonoids	Flavones	649860	432060	510580	850370	267740	354910	222250	586720	1.05446
mws0052	447.09	271.07	446.085	C21H18O11	[M+H]+	Baicalin	Flavonoids	Flavones	43817	57696	49308	55382	77205	153850	73671	66023	1.12917
MWSHY0031	447.09	271.06	446.085	C21H18O11	[M+H]+	Apigenin-7-O-glucuronide	Flavonoids	Flavones	47418	43019	58294	54813	68937	151730	76881	95344	1.22619
Hmpp003270	449.11	287.05	448.101	C21H20O11	[M+H]+	Luteolin-4'-O-glucoside*	Flavonoids	Flavones	15100000	18290000	6982100	25874000	8009700	4587500	4401000	9697600	1.1143
Lmlp003531	449.11	287.06	448.101	C21H20O11	[M+H]+	Luteolin-3'-O-glucoside*	Flavonoids	Flavones	13176000	17129000	9090000	27542000	6908000	6690700	7347400	8331300	1.19574
Hmgp002148	479.12	317.06	478.112	C22H22O12	[M+H]+	Nepetin-7-O-alloside	Flavonoids	Flavones	373070	462940	381830	669030	305080	232800	243590	317480	1.22142
pmb3042	491.12	329.1	492.127	C23H24O12	[M-H]-	Tricin-5-O-Glucoside	Flavonoids	Flavones	140830	164360	264140	155970	255000	294980	266970	194270	1.03474
MWSHY0080	595.17	287.06	594.158	C27H30O15	[M+H]+	Luteolin-7-O-neohesperidoside (Lonicerin)	Flavonoids	Flavones	14275000	22375000	8930100	24112000	5346300	4257300	2535000	7902400	1.3053
Hmpp002612	611.16	287.05	610.153	C27H30O16	[M+H]+	Luteolin-7-O-gentiobioside	Flavonoids	Flavones	2979600	3134500	1857200	4164600	1449000	1231000	960240	1576000	1.32935
Zmxp002867	625.17	301.07	624.168	C28H32O16	[M+H]+	Chrysoeriol-5,7-di-O-glucoside	Flavonoids	Flavones	99754	127920	118100	145260	59151	75929	60271	109080	1.20725
Hmqp003435	651.15	271.06	650.142	C29H30O17	[M+H]+	Apigenin-7-O-(2''-O-apiosyl)(6''-Malonyl)glucoside	Flavonoids	Flavones	24717000	24375000	24677000	27597000	18440000	18346000	21492000	19274000	1.38853
Hmqp003184	667.15	287.06	666.143	C29H30O18	[M+H]+	Luteolin-7-O-(6''-malonyl)glucoside-5-O-arabinoside	Flavonoids	Flavones	1215900	1277900	1558900	1498300	1076900	1001600	722570	1193100	1.16052
mws2627	317.07	285.04	316.058	C16H12O7	[M+H]+	Tamarixetin (3,3',5,7-Tetrahydroxy-4'-Methoxyflavone)	Flavonoids	Flavonols	32513	33265	35441	44368	29787	28499	24163	32284	1.0962
pmn001551	417.12	402.07	418.126	C21H22O9	[M-H]-	Natsudaidain (3-Hydroxy-3',4',5,6,7,8-hexamethoxyflavone)	Flavonoids	Flavonols	11407	12869	11213	10050	16720	21466	27223	26127	1.4075
mws0913	447.09	285	448.101	C21H20O11	[M-H]-	Kaempferol-3-O-galactoside (Trifolin)*	Flavonoids	Flavonols	1795400	2548600	1188400	5026500	633080	640940	425580	879500	1.29045
mws0089	447.09	285.04	448.101	C21H20O11	[M-H]-	Kaempferol-7-O-glucoside*	Flavonoids	Flavonols	2276700	2589000	1283700	4196100	827020	863740	504000	1149400	1.28437
MWSHY0136	449.11	287.06	448.101	C21H20O11	[M+H]+	Kaempferol-3-O-glucoside (Astragalin)*	Flavonoids	Flavonols	16836000	20041000	10075000	30258000	8590100	7515500	6794900	9617300	1.2342
Xmyp005654	449.11	287.06	448.101	C21H20O11	[M+H]+	Kaempferol-4'-O-glucoside*	Flavonoids	Flavonols	13311000	18089000	7832200	25896000	5635500	5089100	3611900	7792300	1.25653
pmp001309	465.1	303.1	464.095	C21H20O12	[M+H]+	6-Hydroxykaempferol-7-O-glucoside	Flavonoids	Flavonols	310380	391390	280150	413010	197550	206920	167270	341370	1.11543
mws0856	463.09	301	464.095	C21H20O12	[M-H]-	Quercetin-4'-O-glucoside (Spiraeoside)	Flavonoids	Flavonols	591180	896990	492120	873800	298940	341280	92477	584610	1.06976
Lmjp003295	479.12	317.07	478.111	C22H22O12	[M+H]+	6-Methoxykaempferol-3-O-glucoside	Flavonoids	Flavonols	426580	411380	365850	597960	203040	277230	259620	349420	1.22909
Lmjp003044	479.12	317.06	478.111	C22H22O12	[M+H]+	Isorhamnetin-3-O-Glucoside*	Flavonoids	Flavonols	372220	501100	415500	640290	292610	308660	279340	342810	1.23249
Hmcp002207	479.12	317.06	478.111	C22H22O12	[M+H]+	Isorhamnetin-7-O-glucoside (Brassicin)*	Flavonoids	Flavonols	373070	462940	381830	669030	305080	232800	243590	317480	1.22142
Lmjp002906	479.12	317.07	478.111	C22H22O12	[M+H]+	Rhamnetin-3-O-Glucoside*	Flavonoids	Flavonols	380130	397020	379280	519750	275550	348210	138160	243650	1.14355
Lmmn003398	489.11	285.04	490.111	C23H22O12	[M-H]-	Kaempferol-3-O-(6''-acetyl)glucoside	Flavonoids	Flavonols	2403700	4756800	3019900	10745000	1181400	1435600	679310	1991700	1.20874
pmb0565	509.13	347.08	508.122	C23H24O13	[M+H]+	Syringetin-3-O-glucoside	Flavonoids	Flavonols	811160	1017900	822300	914550	679150	609970	528450	596850	1.39701
Lmmp003817	535.11	287.05	534.101	C24H22O14	[M+H]+	Kaempferol-3-O-(6''-malonyl)glucoside*	Flavonoids	Flavonols	12067000	12856000	7200500	19100000	6683400	5613100	3472400	7960300	1.1748
Lmdp004892	535.11	287.05	534.101	C24H22O14	[M+H]+	Kaempferol-3-O-(6''-malonyl)galactoside*	Flavonoids	Flavonols	10143000	12310000	6524100	20639000	5488000	3286000	3125700	6950700	1.19948
HJAP064	565.12	317.08	564.088	C25H24O15	[M+H]+	Isorhamnetin-3-O-(6''-malonyl)glucoside	Flavonoids	Flavonols	81291	86326	38042	122300	35979	40329	23112	52519	1.10215
Lmsp004670	595.17	287.06	594.158	C27H30O15	[M+H]+	Kaempferol-3-O-glucoside-7-O-rhamnoside*	Flavonoids	Flavonols	11266000	19757000	8929300	25912000	4932300	3964900	2638500	6704500	1.31128
MWSslk254	595.17	287.06	594.158	C27H30O15	[M+H]+	Kaempferol-3-O-glucorhamnoside*	Flavonoids	Flavonols	12573000	20594000	8514600	25863000	5137300	3876200	2848000	7550300	1.29469
Lmjp002867	595.17	287.05	594.158	C27H30O15	[M+H]+	Kaempferol-3-O-neohesperidoside*	Flavonoids	Flavonols	14107000	21514000	9496800	25737000	4027800	3683400	2629400	7236100	1.36072
MWSHY0050	595.17	287.05	594.158	C27H30O15	[M+H]+	Kaempferol-3-O-rutinoside(Nicotiflorin)*	Flavonoids	Flavonols	14694000	20379000	9486600	24950000	4749800	4108700	2541500	7635200	1.34197
pme1605	593.15	285	594.158	C27H30O15	[M-H]-	Kaempferol-3-O-robinobioside(Biorobin)	Flavonoids	Flavonols	5877200	10613000	3496000	11476000	1884000	2066400	1242600	3200000	1.29461
Lmbp002592	611.16	287.05	610.153	C27H30O16	[M+H]+	Kaempferol-3,7-O-diglucoside	Flavonoids	Flavonols	2693000	2867200	1764700	3874200	1343200	1138300	949190	1554600	1.32359
HJAP120	625.17	317.07	624.168	C28H32O16	[M+H]+	Rhamnetin-3-O-Rutinoside*	Flavonoids	Flavonols	141540	138210	65327	141380	50419	35650	39402	86429	1.22405
Lmsp004721	625.18	317.07	624.169	C28H32O16	[M+H]+	Tamarixetin-3-O-glucoside-7-O-rhamnoside	Flavonoids	Flavonols	132460	133370	78304	171100	41417	40553	39010	90030	1.27966
MWSHY0135	625.18	317.08	624.169	C28H32O16	[M+H]+	Isorhamnetin-3-O-rutinoside (Narcissin)*	Flavonoids	Flavonols	129920	167910	76492	163900	67266	42048	34925	104530	1.15578
Lmmp002463	625.18	317.07	624.169	C28H32O16	[M+H]+	Sexangularetin-3-O-glucoside-7-O-rhamnoside	Flavonoids	Flavonols	110690	158770	71678	148050	54967	43280	44774	87330	1.21605
Lmmp002963	625.18	317.06	624.169	C28H32O16	[M+H]+	6-C-Methylquercetin-3-O-rutinoside	Flavonoids	Flavonols	117020	143350	65704	139180	47875	39017	42533	77129	1.26065
MWSHY0064	625.17	317.07	624.169	C28H32O16	[M+H]+	Isorhamnetin-3-O-neohesperidoside*	Flavonoids	Flavonols	137190	177030	110440	166330	36015	40553	44329	115450	1.2788
Hmcp001629	697.16	449.1	696.153	C30H32O19	[M+H]+	Kaempferol-3-O-(6''-Malonyl)glucoside-7-O-Glucoside	Flavonoids	Flavonols	2310900	2449300	1384500	3083900	823700	847000	538990	1504700	1.27697
Hmcp001618	743.2	449.1	742.195	C32H38O20	[M+H]+	Quercetin-3-O-(2''-O-Xylosyl)rutinoside	Flavonoids	Flavonols	5172700	4228400	3847100	4309600	3252900	2382900	2134100	2550800	1.40008
Lmpp003268	757.22	287.06	756.211	C33H40O20	[M+H]+	Kaempferol-3-O-rutinoside-7-O-glucoside	Flavonoids	Flavonols	224170	281640	122490	319710	116550	91689	91871	148810	1.18468
pmp001105	757.22	287.06	756.211	C33H40O20	[M+H]+	Kaempferol-3-O-neohesperidoside-7-O-glucoside	Flavonoids	Flavonols	670750	785890	464650	826790	351300	348620	253860	434880	1.32281
Hmcp001329	759.2	303.05	758.191	C32H38O21	[M+H]+	Quercetin-3-O-xylosyl(1→2)glucosyl(1→2)glucoside	Flavonoids	Flavonols	130620	146490	120040	125340	95373	86903	74726	89677	1.44519
mws0034	457.08	169.01	458.085	C22H18O11	[M-H]-	Epigallocatechin-3-gallate	Flavonoids	Flavanols	9131.7	9	9	9	12030	17820	9568.9	16689	1.18415
Lmmp000897	611.14	287.05	610.132	C30H26O14	[M+H]+	Gallocatechin-(4α→8)-gallocatechin	Flavonoids	Flavanols	4078200	5479700	2727500	9622800	1207900	1463500	942110	2057400	1.32124
MWSHY0137	273.08	153.02	272.068	C15H12O5	[M+H]+	Naringenin (5,7,4'-Trihydroxyflavanone)	Flavonoids	Flavanones	25192000	30298000	23488000	31954000	13502000	13496000	13532000	24937000	1.24271
pme1662	287.08	167	286.084	C16H14O5	[M+H]+	5,4'-Dihydroxy-7-methoxyflavanone (Sakuranetin)	Flavonoids	Flavanones	9	9	9	9	3253.2	4447.5	2412.2	3473.8	1.53278
mws0064	287.06	135	288.063	C15H12O6	[M-H]-	Eriodictyol (5,7,3',4'-Tetrahydroxyflavanone)	Flavonoids	Flavanones	72317	108700	80531	83487	45638	32906	29971	58246	1.34732
mws1564	301.11	181.3	300.1	C17H16O5	[M+H]+	Farrerol (6,8-Dimethyl-5,7,4'-trihydroxyflavanone)	Flavonoids	Flavanones	175320	178790	171490	212770	110620	114210	97987	122260	1.46249
HJN087	433.12	271.06	434.121	C21H22O10	[M-H]-	Naringenin-4'-O-glucoside	Flavonoids	Flavanones	9128000	13526000	7672500	17544000	3781400	4466600	4109500	8922800	1.19545
Zmhn001036	433.11	271.06	434.121	C21H22O10	[M-H]-	Choerospondin	Flavonoids	Flavanones	30438000	52253000	21255000	52272000	5689700	9363400	4827300	22551000	1.27358
mws1179	433.11	271	434.121	C21H22O10	[M-H]-	Naringenin-7-O-glucoside (Prunin)	Flavonoids	Flavanones	13478000	31862000	9725800	29216000	2123000	3398600	1843400	10525000	1.26562
HJN090	433.11	271.06	434.121	C21H22O10	[M-H]-	Butin-7-O-glucoside	Flavonoids	Flavanones	10551000	14172000	8070900	18253000	3283000	4603100	3537900	10093000	1.19627
MWS20145	451.12	289.07	450.116	C21H22O11	[M+H]+	Eriodictyol-7-O-glucoside	Flavonoids	Flavanones	9	9	9	9	99292	100860	72615	89540	1.53606
pmb3023	449.11	287	450.116	C21H22O11	[M-H]-	Eriodictyol-8-C-glucoside	Flavonoids	Flavanones	371840	518730	337320	720260	92382	161540	94716	196740	1.38184
HJN086	449.11	287.06	450.116	C21H22O11	[M-H]-	Eriodictyol-3'-O-glucoside	Flavonoids	Flavanones	90721	96480	66416	147740	38103	37436	39868	67652	1.26739
Jmgn004021	449.11	269.05	450.116	C21H22O11	[M-H]-	6-C-Glucosyl-2-Hydroxynaringenin	Flavonoids	Flavanones	2536600	3505900	1814900	4647300	548850	764430	407980	1161000	1.38384
Lmzp002365	465.14	303.09	464.131	C22H24O11	[M+H]+	Hesperetin-7-O-glucoside	Flavonoids	Flavanones	1112300	1007900	1209600	1341200	718810	840680	632070	728040	1.40616
pme1598	463.12	301	464.132	C22H24O11	[M-H]-	Hesperetin-5-O-glucoside	Flavonoids	Flavanones	637530	852370	553780	918390	292940	327030	328250	558950	1.28069
mws1454	477.14	315	478.148	C23H26O11	[M-H]-	Persicoside	Flavonoids	Flavanones	9	9	9	9	24008	23756	15631	16307	1.53548
pma0791	521	273	520.122	C24H24O13	[M+H]+	Naringenin-7-O-(6''-malonyl)glucoside	Flavonoids	Flavanones	2950400	5432200	2065500	7482300	400320	543510	540910	2217200	1.26959
pmb0686	537.12	289	536.117	C24H24O14	[M+H]+	Eriodictyol-7-O-(6''-malonyl)glucoside	Flavonoids	Flavanones	341420	386790	192670	514520	178410	120800	87304	210850	1.21432
mws0914	271.06	151	272.068	C15H12O5	[M-H]-	Pinobanksin	Flavonoids	Flavanonols	19728000	26156000	25589000	29339000	9857200	9273300	12565000	18072000	1.31964
Lmtn002796	449.1	287.05	450.116	C21H22O11	[M-H]-	Aromadendrin-7-O-glucoside	Flavonoids	Flavanonols	1366100	1797300	948820	2355200	274520	499300	307810	583760	1.38781
pme2960	273.08	153	272.068	C15H12O5	[M+H]+	Naringenin chalcone; 2',4,4',6'-Tetrahydroxychalcone	Flavonoids	Chalcones	67862000	73757000	67445000	85543000	41370000	38159000	47273000	63321000	1.27119
pme1201	273.08	167	274.084	C15H14O5	[M-H]-	Phloretin	Flavonoids	Chalcones	159780	165780	192120	271380	70692	67738	72663	109080	1.3943
Lmlp006175	435.13	273.09	434.121	C21H22O10	[M+H]+	Isosalipurposide (Phlorizin Chalcone)	Flavonoids	Chalcones	12478000	18671000	10147000	19448000	5078700	6603600	6456600	14053000	1.10483
HJN055	435.13	273.08	436.136	C21H24O10	[M-H]-	Dihydrocharcone-4'-O-glucoside	Flavonoids	Chalcones	473920	668050	412640	811890	118900	172950	124710	213620	1.43384
Lmfn004093	435.13	315.09	436.137	C21H24O10	[M-H]-	Phloretin-4'-O-glucoside (Trilobatin)	Flavonoids	Chalcones	803280	1582400	627340	2060600	296080	502960	231570	737580	1.14951
mws2118	435.13	166.7	436.137	C21H24O10	[M-H]-	Phloretin-2'-O-glucoside (Phlorizin)	Flavonoids	Chalcones	710110	951230	697670	1181400	248330	236030	213550	425390	1.4184
pmn001716	447.09	285.04	448.101	C21H20O11	[M-H]-	Carthamone	Flavonoids	Chalcones	1308800	1965500	796280	2787100	475870	498710	273820	704850	1.28011
Lmsn003297	449.11	287.06	450.116	C21H22O11	[M-H]-	3,4,2',4',6'-Pentahydroxychalcone-4'-O-glucoside	Flavonoids	Chalcones	9	9	9	9	73956	79851	186840	90568	1.53754
Hmpn005101	451.12	289.07	452.131	C21H24O11	[M-H]-	Sieboldin	Flavonoids	Chalcones	55584	47284	37713	77889	16224	26569	10085	25022	1.32208
Lmsn004797	451.12	167.03	452.132	C21H24O11	[M-H]-	3-Hydroxyphloretin-4'-O-glucoside	Flavonoids	Chalcones	110780	78697	126150	81466	97449	150640	164410	200260	1.01248
HJAP012	419.1	383.07	418.09	C20H18O10	[M+H]+	Luteolin-8-C-arabinoside	Flavonoids	Flavonoid carbonoside	19726	23328	21632	13764	24645	22594	29503	37168	1.03611
pma6218	419.1	383.1	418.126	C21H22O9	[M+H]+	O-MethylNaringenin-8-C-arabinoside	Flavonoids	Flavonoid carbonoside	71694	38333	51291	48679	83540	80532	73054	73358	1.18013
mws1434	431.1	311	432.106	C21H20O10	[M-H]-	Apigenin-6-C-glucoside (Isovitexin)*	Flavonoids	Flavonoid carbonoside	1143300	1175200	808330	2560100	537930	549150	431460	1074200	1.07793
pme1611	433.11	313	434.121	C21H22O10	[M-H]-	Isohemiphloin	Flavonoids	Flavonoid carbonoside	3864400	6373700	2650300	8022500	1139900	1406800	940790	3092700	1.23897
Lmtp002942	535.14	499.12	534.137	C25H26O13	[M+H]+	Apigenin-6,8-di-C-arabinoside*	Flavonoids	Flavonoid carbonoside	95667	72429	66858	103070	57984	76192	46554	68443	1.01091
Lmtp002822	535.14	499.12	534.137	C25H26O13	[M+H]+	Apigenin-6-C-arabinoside-8-C-xyloside*	Flavonoids	Flavonoid carbonoside	121810	124500	90254	135570	62737	117770	78735	84381	1.01215
mws1292	565.16	409.09	564.123	C26H28O14	[M+H]+	Isoschaftoside	Flavonoids	Flavonoid carbonoside	1402300	1429400	1184200	1771000	1100200	1068400	871090	1164100	1.2037
Lmtp002642	565.16	457.11	564.148	C26H28O14	[M+H]+	Apigenin-8-C-(2''-glucosyl)arabinoside	Flavonoids	Flavonoid carbonoside	4540700	3913300	3848300	4630900	3611000	3696700	3498700	3641300	1.21946
Lmtp002474	565.16	427.1	564.148	C26H28O14	[M+H]+	Apigenin-6-C-(2''-glucosyl)arabinoside	Flavonoids	Flavonoid carbonoside	2142000	2199400	1933900	2645500	2081900	1984700	1432200	1570900	1.01169
Lmnp102580	565.16	433.11	564.148	C26H28O14	[M+H]+	Apigenin-6-C-(2''-xylosyl)glucoside	Flavonoids	Flavonoid carbonoside	680530	644280	505870	804110	9	9	9	9	1.5367
mws1073	595.17	457.2	594.158	C27H30O15	[M+H]+	Apigenin-6,8-di-C-glucoside (Vicenin-2)	Flavonoids	Flavonoid carbonoside	11688000	11938000	10036000	13431000	10706000	9250800	8994400	10577000	1.05995
pmp001106	595.17	577.16	594.158	C27H30O15	[M+H]+	Vitexin-2''-O-glucoside	Flavonoids	Flavonoid carbonoside	1925700	1589300	1493700	2002000	1474300	1278400	1373700	1483700	1.14989
Zmjp003031	611.16	449.11	610.153	C27H30O16	[M+H]+	Orientin-2''-O-galactoside	Flavonoids	Flavonoid carbonoside	1626700	1906100	1227100	2383500	1083100	908360	803600	1188400	1.25441
Lmnp002584	625.18	463.13	624.169	C28H32O16	[M+H]+	Hispidulin-8-C-(2''-O-glucosyl)glucoside	Flavonoids	Flavonoid carbonoside	100860	86364	116000	75477	165220	162540	146810	185990	1.37778
HJAP026	625.18	463.13	624.17	C28H32O16	[M+H]+	Chrysoeriol-6-C-glucoside-4'-O-glucoside	Flavonoids	Flavonoid carbonoside	119200	79173	114300	91589	169330	154820	165920	218600	1.33881
MWSslk012	583.13	463.09	584.138	C25H28O16	[M-H]-	Neomangiferin	Flavonoids	Other Flavonoids	60793	53823	51898	68933	46622	29267	28416	36403	1.31877
pmb0069	122	105	121.053	C7H7NO	[M+H]+	Benzamide	Phenolic acids	Phenolic acids	924440	910520	961000	902200	1018100	993650	1007300	1043700	1.39112
mws1336	138.06	120	137.048	C7H7NO2	[M+H]+	4-Aminobenzoic acid	Phenolic acids	Phenolic acids	107170	64313	88471	135840	151350	127450	136340	140900	1.06627
pmp001285	149.02	65.04	148.016	C8H4O3	[M+H]+	Phthalic anhydride	Phenolic acids	Phenolic acids	258700	245560	223770	221980	204220	170980	187270	205700	1.31327
pmb0142	165.1	95.2	164.047	C9H8O3	[M+H]+	Caffeic aldehyde	Phenolic acids	Phenolic acids	25874	30676	23761	22861	18078	22091	16744	15676	1.28206
Lmrn003000	165.06	103.06	166.063	C9H10O3	[M-H]-	2-Hydroxy-3-phenylpropanoic acid	Phenolic acids	Phenolic acids	12830	7854.8	5418.1	7245.6	11490	9	9	9	1.15828
NK10253223	168.06	94.06	167.058	C8H9NO3	[M+H]+	2-Amino-3-methoxybenzoic acid	Phenolic acids	Phenolic acids	100710	121310	107220	110480	36798	41722	40910	52945	1.50307
Hmbp001276	169.05	65.03	168.042	C8H8O4	[M+H]+	Gallacetophenone	Phenolic acids	Phenolic acids	8375600	9667400	8262800	9313700	5682500	7718500	7540300	8331200	1.02737
mws1200	177	145	178.063	C10H10O3	[M-H]-	Trans-4-Hydroxycinnamic Acid Methyl Ester	Phenolic acids	Phenolic acids	6263.9	9894.1	3007.7	9526.9	3344.7	1368.9	1030.6	6026	1.02527
pmb2497	197	153	198.053	C9H10O5	[M-H]-	4-Hydroxy-3-methoxymandelate	Phenolic acids	Phenolic acids	216830	206380	212140	169020	270060	253020	294800	279600	1.35476
MWSmce675	271.08	108.02	272.09	C12H16O7	[M-H]-	Arbutin	Phenolic acids	Phenolic acids	117380	135310	122870	176830	80065	99608	69763	93796	1.29502
MWSmce341	279.16	149.03	278.152	C16H22O4	[M+H]+	Butyl isobutyl phthalate*	Phenolic acids	Phenolic acids	13018000	11141000	11853000	11377000	11160000	10647000	9259800	10392000	1.1558
Lmxp011770	279.16	149.02	278.152	C16H22O4	[M+H]+	Diisobutyl phthalate*	Phenolic acids	Phenolic acids	12450000	12192000	11225000	12071000	11841000	10487000	9758100	10673000	1.13395
Lmlp012720	279.16	149.02	278.152	C16H22O4	[M+H]+	Dibutyl phthalate*	Phenolic acids	Phenolic acids	12113000	11587000	12224000	11475000	11430000	10422000	10115000	10665000	1.28352
mws1521	285.1	121.03	286.105	C13H18O7	[M-H]-	Salicin	Phenolic acids	Phenolic acids	663780	726720	523160	987390	392220	464650	338150	581000	1.15922
Lmln001195	297.1	135.07	298.105	C14H18O7	[M-H]-	Picein (4-Acetylphenyl-glucoside)	Phenolic acids	Phenolic acids	3135.8	6563.1	5457.5	5261.5	5578.8	6791.2	12033	11165	1.05875
pmb3142	299.1	137.1	300.085	C13H16O8	[M-H]-	Salicylic acid-2-O-glucoside	Phenolic acids	Phenolic acids	1438700	1554700	1201600	2291100	702320	844610	627860	1002000	1.32174
Lmsn002247	299.08	137.02	300.085	C13H16O8	[M-H]-	1-O-Salicyloyl-β-D-glucose*	Phenolic acids	Phenolic acids	15022000	18018000	13699000	22259000	8202300	9413000	7626300	10756000	1.3727
Hmsn002598	301.09	139.04	302.1	C13H18O8	[M-H]-	Salirepin	Phenolic acids	Phenolic acids	23388	29861	24063	33776	39041	29182	39812	44772	1.12659
Lmmn002179	313.09	107.05	314.1	C14H18O8	[M-H]-	Methyl salicylate-2-O-glucoside	Phenolic acids	Phenolic acids	698060	766700	693310	758710	476490	638260	472660	458690	1.34549
pmb2871	315.07	153	316.079	C13H16O9	[M-H]-	1-O-Gentisoyl-β-D-glucoside	Phenolic acids	Phenolic acids	145460	165350	147740	204840	82462	75912	81726	112150	1.39538
Lmfp001509	317.09	153.02	316.079	C13H16O9	[M+H]+	1-O-Galloyl-rhamnose	Phenolic acids	Phenolic acids	465920	431440	471540	447890	513880	574630	535200	618230	1.33622
pmn001367	315.07	153.02	316.079	C13H16O9	[M-H]-	Protocatechuic acid-4-O-glucoside	Phenolic acids	Phenolic acids	3787000	3830000	3576600	4086400	2829300	3023100	3192700	3324500	1.36165
pmn001419	325.09	163.04	326.1	C15H18O8	[M-H]-	1-O-p-Coumaroyl-β-D-glucose	Phenolic acids	Phenolic acids	6000800	5954000	5349700	7242700	5133900	5630500	4635000	4952900	1.08374
Hmhn003067	325.09	119.05	326.1	C15H18O8	[M-H]-	Phenylpropionic acid-O-β-D-glucopyranoside	Phenolic acids	Phenolic acids	84030000	86529000	87026000	90137000	78837000	77031000	73137000	83646000	1.25862
Lmmn003663	329.09	167.04	330.095	C14H18O9	[M-H]-	5-Glucosyloxy-2-Hydroxybenzoic acid methyl ester	Phenolic acids	Phenolic acids	699480	861970	623770	761610	593340	565270	564350	630020	1.1956
pma0149	341.08	207.07	340.079	C15H16O9	[M+H]+	Sinapoyl malate	Phenolic acids	Phenolic acids	5771000	6743000	6889000	6312500	5636400	6000100	5540100	5923300	1.06095
Jmwn002620	341.09	161.02	342.095	C15H18O9	[M-H]-	Vanillic Acid-4-O-Glucuronide	Phenolic acids	Phenolic acids	3859600	4002700	3843800	4480500	4834300	4691800	4163200	4735400	1.12793
pmn001420	341.09	179.04	342.095	C15H18O9	[M-H]-	1-O-Caffeoyl-β-D-glucose*	Phenolic acids	Phenolic acids	50787000	54616000	45946000	51493000	46351000	48422000	39548000	44133000	1.07592
mws2108	353.09	191.05	354.095	C16H18O9	[M-H]-	Cryptochlorogenic acid (4-O-Caffeoylquinic acid)	Phenolic acids	Phenolic acids	6934300	4578100	3114200	9819400	1128700	1331700	1167200	4044100	1.22546
mws0748	353.09	191.1	354.095	C16H18O9	[M-H]-	1-Caffeoylquinic acid	Phenolic acids	Phenolic acids	532170	207140	210460	208810	93058	190460	161910	171620	1.01736
mws0178	353.09	191.01	354.095	C16H18O9	[M-H]-	Chlorogenic acid (3-O-Caffeoylquinic acid)	Phenolic acids	Phenolic acids	9569000	6573500	4300500	14688000	1608900	2561900	1509600	5783000	1.19247
mws0179	367.1	190.9	368.111	C17H20O9	[M-H]-	Chlorogenic acid methyl ester	Phenolic acids	Phenolic acids	155870	173260	149840	261940	60627	73030	47757	94316	1.39236
Lmzn001983	375.13	135.05	376.137	C16H24O10	[M-H]-	D-Threo-guaiacylglycerol-7-O-β-D-glucoside	Phenolic acids	Phenolic acids	67503	78951	66449	77125	42651	43490	43490	61314	1.34734
Lmtn002324	431.15	269.1	432.163	C19H28O11	[M-H]-	Benzyl-(2''-O-glucosyl)glucoside*	Phenolic acids	Phenolic acids	12444	24981	10599	22700	31104	34437	36371	38817	1.26681
Cmzn005251	433.11	271.06	434.121	C21H22O10	[M-H]-	6-O-Caffeoylarbutin	Phenolic acids	Phenolic acids	22223000	37867000	17234000	36049000	4385200	6857000	3661700	15982000	1.30253
pmb2654	460.1	117.9	461.153	C19H27NO12	[M-H]-	Anthranilate-1-O-Sophoroside	Phenolic acids	Phenolic acids	2761100	3602700	4294700	3709700	2882200	2560400	2584500	2993000	1.08365
pmb3072	481.14	319.3	482.142	C22H26O12	[M-H]-	3-O-p-Coumaroylshikimic acid-O-glucoside	Phenolic acids	Phenolic acids	36300	33307	32802	37415	27929	22717	34283	29990	1.01381
pmb3064	499.15	163.2	500.153	C22H28O13	[M-H]-	3-O-p-Coumaroylquinic acid-O-glucoside	Phenolic acids	Phenolic acids	22356	18013	20970	15524	9	9	4471.4	9	1.27783
Lmsn002288	503.14	341.09	504.148	C21H28O14	[M-H]-	1-O-Caffeoyl-(6-O-glucosyl)-β-D-glucose	Phenolic acids	Phenolic acids	1099000	1208600	1574200	1288800	1018700	1070700	730740	1048100	1.10404
pmb0824	537.1	177.4	536.153	C25H28O13	[M+H]+	Syringic acid-4-O-(6''-feruloyl)glucoside	Phenolic acids	Phenolic acids	34374	40381	57769	45094	85825	79242	88419	71269	1.41676
pmn001743	685.23	523.2	686.242	C31H42O17	[M-H]-	Specnuezhenide	Phenolic acids	Phenolic acids	160790	129230	163650	127530	242750	218990	192210	165440	1.20672
Lmgn002253	695.2	353.09	696.19	C31H36O18	[M-H]-	Syringoylcaffeoylquinic acid-D-glucose	Phenolic acids	Phenolic acids	1004400	881980	532350	1982400	212400	187520	121320	552210	1.27224
Lmdn001925	537.2	375.15	538.205	C26H34O12	[M-H]-	Olivil-4'-O-glucoside	Lignans and Coumarins	Lignans	24255	22651	23070	27799	25847	28246	29480	33428	1.1093
Zmdn003480	537.2	375.15	538.205	C26H34O12	[M-H]-	Cycloolivil-6-O-glucoside	Lignans and Coumarins	Lignans	24255	22651	23070	27799	25847	28246	29480	33428	1.1093
Lmmn002260	551.21	389.17	552.221	C27H36O12	[M-H]-	5'-Methoxyisolariciresinol-9'-O-glucoside	Lignans and Coumarins	Lignans	149830	105800	122390	152730	52145	106630	94597	99921	1.05861
Cmqn003939	741.26	501.17	742.268	C34H46O18	[M-H]-	liriodendrin;Syringaresinol-di-O-glucoside	Lignans and Coumarins	Lignans	15111	15011	12357	11811	16631	20087	24666	21027	1.30405
Lmdn004267	357.13	151.04	358.142	C20H22O6	[M-H]-	Epipinoresinol*	Lignans and Coumarins	Lignans	9	9	3654.8	9	5926.2	9234.9	6604.6	8232.4	1.26227
mws0097	357.13	151	358.142	C20H22O6	[M-H]-	Pinoresinol*	Lignans and Coumarins	Lignans	9	9546.4	9	9	13190	6360.8	10406	10997	1.1906
Cmpp003619	193.05	105.07	192.042	C10H8O4	[M+H]+	6,7-Dihydroxy-4-methylcoumarin	Lignans and Coumarins	Coumarins	81167	9	9	9	45527	58111	52254	39757	1.11228
MWSmce265	247.09	229.09	246.089	C14H14O4	[M+H]+	Decursinol	Lignans and Coumarins	Coumarins	9	9	9	9	14466	11821	26144	20280	1.53657
Lmbn001162	339.07	177.02	340.079	C15H16O9	[M-H]-	Esculetin-7-O-glucoside	Lignans and Coumarins	Coumarins	292620	462820	367650	373390	551180	429700	451180	467840	1.07099
mws1015	339.07	177	340.079	C15H16O9	[M-H]-	Esculin (6,7-DihydroxyCoumarin-6-glucoside)	Lignans and Coumarins	Coumarins	286920	450570	289860	400760	604490	464720	528870	440150	1.17339
Hmhp004269	409.15	229.09	408.141	C20H24O9	[M+H]+	Nodakenin	Lignans and Coumarins	Coumarins	141470	211330	109750	108840	93864	105170	63654	111050	1.02834

## Sheet: Table S4B
Table S4B. Potential significant differential metabolites between N0 and N400
Index	Q1 (Da)	Q3 (Da)	Molecular Weight (Da)	Formula	Ionization model	Compounds	Class I	Class II	N0-1	N0-2	N0-3	N0-4	N400-1	N400-2	N400-3	N400-4	VIP
pmb3006	431.1	269.1	432.106	C21H20O10	[M-H]-	Apigenin-7-O-glucoside(Cosmosiin)	Flavonoids	Flavones	167620	105030	72628	257050	60260	102130	76563	67681	1.01527
mws0072	433.11	271.01	432.106	C21H20O10	[M+H]+	Apigenin-5-O-glucoside	Flavonoids	Flavones	584450	840170	627360	1058800	327310	393760	503060	618130	1.16308
Lmlp003531	449.11	287.06	448.101	C21H20O11	[M+H]+	Luteolin-3'-O-glucoside*	Flavonoids	Flavones	13176000	17129000	9090000	27542000	4861000	8942100	8295400	8310100	1.19203
pmp000577	461.12	285.08	460.116	C26H20O8	[M+H]+	Acacetin-7-O-glucuronide	Flavonoids	Flavones	9	9	9	9	45572	48674	51157	18743	1.57343
Hmgp002148	479.12	317.06	478.112	C22H22O12	[M+H]+	Nepetin-7-O-alloside	Flavonoids	Flavones	373070	462940	381830	669030	151460	282310	332230	355170	1.07794
pmb3042	491.12	329.1	492.127	C23H24O12	[M-H]-	Tricin-5-O-Glucoside	Flavonoids	Flavones	140830	164360	264140	155970	266970	270690	224370	372090	1.21478
MWSHY0080	595.17	287.06	594.158	C27H30O15	[M+H]+	Luteolin-7-O-neohesperidoside (Lonicerin)	Flavonoids	Flavones	14275000	22375000	8930100	24112000	1958800	5652000	5679400	5836300	1.33205
Hmpp002612	611.16	287.05	610.153	C27H30O16	[M+H]+	Luteolin-7-O-gentiobioside	Flavonoids	Flavones	2979600	3134500	1857200	4164600	618980	1396300	1463200	1172300	1.34181
Zmxp002867	625.17	301.07	624.168	C28H32O16	[M+H]+	Chrysoeriol-5,7-di-O-glucoside	Flavonoids	Flavones	99754	127920	118100	145260	47545	55838	30366	92649	1.25649
Hmqp003435	651.15	271.06	650.142	C29H30O17	[M+H]+	Apigenin-7-O-(2''-O-apiosyl)(6''-Malonyl)glucoside	Flavonoids	Flavones	24717000	24375000	24677000	27597000	16723000	24930000	23447000	19966000	1.01397
Hmqp003184	667.15	287.06	666.143	C29H30O18	[M+H]+	Luteolin-7-O-(6''-malonyl)glucoside-5-O-arabinoside	Flavonoids	Flavones	1215900	1277900	1558900	1498300	986730	1102300	903030	1220200	1.19996
mws0038	313.07	283	314.079	C17H14O6	[M-H]-	Kumatakenin	Flavonoids	Flavonols	7449.5	7681.1	9642.6	6247.1	3906.9	5777	3308.7	4961.5	1.28437
mws2627	317.07	285.04	316.058	C16H12O7	[M+H]+	Tamarixetin (3,3',5,7-Tetrahydroxy-4'-Methoxyflavone)	Flavonoids	Flavonols	32513	33265	35441	44368	27496	26491	30751	26030	1.2956
mws0913	447.09	285	448.101	C21H20O11	[M-H]-	Kaempferol-3-O-galactoside (Trifolin)*	Flavonoids	Flavonols	1795400	2548600	1188400	5026500	313590	1151800	864080	795340	1.21495
mws0089	447.09	285.04	448.101	C21H20O11	[M-H]-	Kaempferol-7-O-glucoside*	Flavonoids	Flavonols	2276700	2589000	1283700	4196100	322120	1020000	955030	903800	1.27249
MWSHY0136	449.11	287.06	448.101	C21H20O11	[M+H]+	Kaempferol-3-O-glucoside (Astragalin)*	Flavonoids	Flavonols	16836000	20041000	10075000	30258000	3864600	10855000	9502500	9419100	1.14985
Xmyp005654	449.11	287.06	448.101	C21H20O11	[M+H]+	Kaempferol-4'-O-glucoside*	Flavonoids	Flavonols	13311000	18089000	7832200	25896000	3998400	7358100	5824300	6690100	1.28642
pmp001309	465.1	303.1	464.095	C21H20O12	[M+H]+	6-Hydroxykaempferol-7-O-glucoside	Flavonoids	Flavonols	310380	391390	280150	413010	158140	255500	254880	277370	1.14006
mws0856	463.09	301	464.095	C21H20O12	[M-H]-	Quercetin-4'-O-glucoside (Spiraeoside)	Flavonoids	Flavonols	591180	896990	492120	873800	209230	448400	449730	598840	1.01045
Hmmp002121	469.12	317.08	468.113	C23H16O11	[M+H]+	Isorhamnetin-3-O-gallate	Flavonoids	Flavonols	264440	195280	283910	282430	204690	234440	163430	174390	1.07052
Lmjp003295	479.12	317.07	478.111	C22H22O12	[M+H]+	6-Methoxykaempferol-3-O-glucoside	Flavonoids	Flavonols	426580	411380	365850	597960	198280	288470	362440	337290	1.13198
Lmjp003044	479.12	317.06	478.111	C22H22O12	[M+H]+	Isorhamnetin-3-O-Glucoside*	Flavonoids	Flavonols	372220	501100	415500	640290	271850	304680	359490	348220	1.2217
Hmcp002207	479.12	317.06	478.111	C22H22O12	[M+H]+	Isorhamnetin-7-O-glucoside (Brassicin)*	Flavonoids	Flavonols	373070	462940	381830	669030	151460	282310	332230	355170	1.07794
Lmjp002906	479.12	317.07	478.111	C22H22O12	[M+H]+	Rhamnetin-3-O-Glucoside*	Flavonoids	Flavonols	380130	397020	379280	519750	166070	282900	261060	346540	1.17419
Lmdp002969	481.1	319.06	480.09	C21H20O13	[M+H]+	Myricetin-3-O-galactoside	Flavonoids	Flavonols	59446	49404	53204	40854	9	62704	9	9	1.22033
Lmmn003398	489.11	285.04	490.111	C23H22O12	[M-H]-	Kaempferol-3-O-(6''-acetyl)glucoside	Flavonoids	Flavonols	2403700	4756800	3019900	10745000	778110	1812200	1635600	2107700	1.18166
pmb0565	509.13	347.08	508.122	C23H24O13	[M+H]+	Syringetin-3-O-glucoside	Flavonoids	Flavonols	811160	1017900	822300	914550	551120	540380	671310	894880	1.08512
Lmmp003817	535.11	287.05	534.101	C24H22O14	[M+H]+	Kaempferol-3-O-(6''-malonyl)glucoside*	Flavonoids	Flavonols	12067000	12856000	7200500	19100000	3148200	7891400	7863600	5398800	1.17021
Lmdp004892	535.11	287.05	534.101	C24H22O14	[M+H]+	Kaempferol-3-O-(6''-malonyl)galactoside*	Flavonoids	Flavonols	10143000	12310000	6524100	20639000	2432000	7058000	6903200	5386100	1.12318
HJAP064	565.12	317.08	564.088	C25H24O15	[M+H]+	Isorhamnetin-3-O-(6''-malonyl)glucoside	Flavonoids	Flavonols	81291	86326	38042	122300	24743	58093	41506	35228	1.1081
Lmsp004670	595.17	287.06	594.158	C27H30O15	[M+H]+	Kaempferol-3-O-glucoside-7-O-rhamnoside*	Flavonoids	Flavonols	11266000	19757000	8929300	25912000	1927800	4712200	6532900	6483000	1.27089
MWSslk254	595.17	287.06	594.158	C27H30O15	[M+H]+	Kaempferol-3-O-glucorhamnoside*	Flavonoids	Flavonols	12573000	20594000	8514600	25863000	1996200	4910200	6377000	5706000	1.3095
Lmjp002867	595.17	287.05	594.158	C27H30O15	[M+H]+	Kaempferol-3-O-neohesperidoside*	Flavonoids	Flavonols	14107000	21514000	9496800	25737000	2045600	5047500	6437800	6072300	1.33588
MWSHY0050	595.17	287.05	594.158	C27H30O15	[M+H]+	Kaempferol-3-O-rutinoside(Nicotiflorin)*	Flavonoids	Flavonols	14694000	20379000	9486600	24950000	2011900	4854600	4641400	6130900	1.37819
pme1605	593.15	285	594.158	C27H30O15	[M-H]-	Kaempferol-3-O-robinobioside(Biorobin)	Flavonoids	Flavonols	5877200	10613000	3496000	11476000	804660	2212000	3039200	2980600	1.24082
Lmbp002592	611.16	287.05	610.153	C27H30O16	[M+H]+	Kaempferol-3,7-O-diglucoside	Flavonoids	Flavonols	2693000	2867200	1764700	3874200	656090	1338500	1250600	1268200	1.3496
HJAP120	625.17	317.07	624.168	C28H32O16	[M+H]+	Rhamnetin-3-O-Rutinoside*	Flavonoids	Flavonols	141540	138210	65327	141380	35104	89393	59191	59422	1.17056
Lmsp004721	625.18	317.07	624.169	C28H32O16	[M+H]+	Tamarixetin-3-O-glucoside-7-O-rhamnoside	Flavonoids	Flavonols	132460	133370	78304	171100	30613	67520	61655	61785	1.30204
MWSHY0135	625.18	317.08	624.169	C28H32O16	[M+H]+	Isorhamnetin-3-O-rutinoside (Narcissin)*	Flavonoids	Flavonols	129920	167910	76492	163900	19804	58983	62778	53120	1.27895
Lmmp002463	625.18	317.07	624.169	C28H32O16	[M+H]+	Sexangularetin-3-O-glucoside-7-O-rhamnoside	Flavonoids	Flavonols	110690	158770	71678	148050	16204	63513	53810	52307	1.21569
Lmmp002963	625.18	317.06	624.169	C28H32O16	[M+H]+	6-C-Methylquercetin-3-O-rutinoside	Flavonoids	Flavonols	117020	143350	65704	139180	25212	63513	67910	62059	1.17427
MWSHY0064	625.17	317.07	624.169	C28H32O16	[M+H]+	Isorhamnetin-3-O-neohesperidoside*	Flavonoids	Flavonols	137190	177030	110440	166330	24312	65327	63675	66624	1.34285
Hmcp001629	697.16	449.1	696.153	C30H32O19	[M+H]+	Kaempferol-3-O-(6''-Malonyl)glucoside-7-O-Glucoside	Flavonoids	Flavonols	2310900	2449300	1384500	3083900	455170	1327800	1204500	1011500	1.23412
Hmcp001618	743.2	449.1	742.195	C32H38O20	[M+H]+	Quercetin-3-O-(2''-O-Xylosyl)rutinoside	Flavonoids	Flavonols	5172700	4228400	3847100	4309600	1474600	3085800	2468400	3105600	1.23416
Lmpp003268	757.22	287.06	756.211	C33H40O20	[M+H]+	Kaempferol-3-O-rutinoside-7-O-glucoside	Flavonoids	Flavonols	224170	281640	122490	319710	82476	132500	130150	126590	1.20259
pmp001105	757.22	287.06	756.211	C33H40O20	[M+H]+	Kaempferol-3-O-neohesperidoside-7-O-glucoside	Flavonoids	Flavonols	670750	785890	464650	826790	157410	262370	395710	329790	1.34176
Hmcp001329	759.2	303.05	758.191	C32H38O21	[M+H]+	Quercetin-3-O-xylosyl(1→2)glucosyl(1→2)glucoside	Flavonoids	Flavonols	130620	146490	120040	125340	80979	127890	74992	90408	1.1992
mws0034	457.08	169.01	458.085	C22H18O11	[M-H]-	Epigallocatechin-3-gallate	Flavonoids	Flavanols	9131.7	9	9	9	7428.5	5005.9	59179	6869.3	1.21648
Lmmp000897	611.14	287.05	610.132	C30H26O14	[M+H]+	Gallocatechin-(4α→8)-gallocatechin	Flavonoids	Flavanols	4078200	5479700	2727500	9622800	553160	1535500	1776000	1762000	1.30498
MWSHY0137	273.08	153.02	272.068	C15H12O5	[M+H]+	Naringenin (5,7,4'-Trihydroxyflavanone)	Flavonoids	Flavanones	25192000	30298000	23488000	31954000	12113000	12016000	16279000	11461000	1.51907
pme3475	273.08	153	272.068	C15H12O5	[M+H]+	Butin; 7,3',4'-Trihydroxyflavanone	Flavonoids	Flavanones	11372000	18841000	12347000	13411000	8599200	6990100	8790600	7201100	1.41517
mws0064	287.06	135	288.063	C15H12O6	[M-H]-	Eriodictyol (5,7,3',4'-Tetrahydroxyflavanone)	Flavonoids	Flavanones	72317	108700	80531	83487	29591	36532	30103	34402	1.53737
mws1564	301.11	181.3	300.1	C17H16O5	[M+H]+	Farrerol (6,8-Dimethyl-5,7,4'-trihydroxyflavanone)	Flavonoids	Flavanones	175320	178790	171490	212770	116660	94414	117780	118550	1.48921
mws0463	301.07	164	302.079	C16H14O6	[M-H]-	Hesperetin	Flavonoids	Flavanones	18921	23061	28122	25762	12656	15468	12253	9074.5	1.42876
mws1033	303.09	153.02	302.079	C16H14O6	[M+H]+	Homoeriodictyol	Flavonoids	Flavanones	45294	55686	61288	65054	43732	52118	41176	27020	1.08956
HJN087	433.12	271.06	434.121	C21H22O10	[M-H]-	Naringenin-4'-O-glucoside	Flavonoids	Flavanones	9128000	13526000	7672500	17544000	1894100	4890000	4811800	7106000	1.20856
Zmhn001036	433.11	271.06	434.121	C21H22O10	[M-H]-	Choerospondin	Flavonoids	Flavanones	30438000	52253000	21255000	52272000	2828800	8847300	14958000	16905000	1.23251
mws1179	433.11	271	434.121	C21H22O10	[M-H]-	Naringenin-7-O-glucoside (Prunin)	Flavonoids	Flavanones	13478000	31862000	9725800	29216000	870450	6074000	4202600	4325600	1.29768
HJN090	433.11	271.06	434.121	C21H22O10	[M-H]-	Butin-7-O-glucoside	Flavonoids	Flavanones	10551000	14172000	8070900	18253000	2313500	4697100	6322600	7010300	1.2467
MWS20145	451.12	289.07	450.116	C21H22O11	[M+H]+	Eriodictyol-7-O-glucoside	Flavonoids	Flavanones	9	9	9	9	200590	87304	75058	82448	1.57937
pmb3023	449.11	287	450.116	C21H22O11	[M-H]-	Eriodictyol-8-C-glucoside	Flavonoids	Flavanones	371840	518730	337320	720260	52216	213690	189150	274900	1.16062
HJN086	449.11	287.06	450.116	C21H22O11	[M-H]-	Eriodictyol-3'-O-glucoside	Flavonoids	Flavanones	90721	96480	66416	147740	37452	34847	44734	45004	1.42912
Jmgn004021	449.11	269.05	450.116	C21H22O11	[M-H]-	6-C-Glucosyl-2-Hydroxynaringenin	Flavonoids	Flavanones	2536600	3505900	1814900	4647300	246620	1247300	1130700	1286800	1.2026
Lmzp002365	465.14	303.09	464.131	C22H24O11	[M+H]+	Hesperetin-7-O-glucoside	Flavonoids	Flavanones	1112300	1007900	1209600	1341200	686330	612940	864950	683000	1.43929
pma0791	521	273	520.122	C24H24O13	[M+H]+	Naringenin-7-O-(6''-malonyl)glucoside	Flavonoids	Flavanones	2950400	5432200	2065500	7482300	175250	1794600	864180	993850	1.2287
pmb0686	537.12	289	536.117	C24H24O14	[M+H]+	Eriodictyol-7-O-(6''-malonyl)glucoside	Flavonoids	Flavanones	341420	386790	192670	514520	74635	184500	217660	156110	1.18821
mws0914	271.06	151	272.068	C15H12O5	[M-H]-	Pinobanksin	Flavonoids	Flavanonols	19728000	26156000	25589000	29339000	9564200	7747400	9707300	8591100	1.54747
mws0744	319.05	301	320.053	C15H12O8	[M-H]-	Dihydromyricetin (Ampelopsin)	Flavonoids	Flavanonols	9	9	9	9	10773	19062	25598	18103	1.57965
Lmtn002796	449.1	287.05	450.116	C21H22O11	[M-H]-	Aromadendrin-7-O-glucoside	Flavonoids	Flavanonols	1366100	1797300	948820	2355200	145680	731730	670650	776690	1.14674
pme2960	273.08	153	272.068	C15H12O5	[M+H]+	Naringenin chalcone; 2',4,4',6'-Tetrahydroxychalcone	Flavonoids	Chalcones	67862000	73757000	67445000	85543000	38096000	27584000	37150000	36032000	1.51924
pme1201	273.08	167	274.084	C15H14O5	[M-H]-	Phloretin	Flavonoids	Chalcones	159780	165780	192120	271380	65124	76402	75265	84359	1.49175
Lmlp006175	435.13	273.09	434.121	C21H22O10	[M+H]+	Isosalipurposide (Phlorizin Chalcone)	Flavonoids	Chalcones	12478000	18671000	10147000	19448000	2830000	6903400	8393100	9961400	1.15017
HJN055	435.13	273.08	436.136	C21H24O10	[M-H]-	Dihydrocharcone-4'-O-glucoside	Flavonoids	Chalcones	473920	668050	412640	811890	81007	156410	224720	206870	1.40644
Lmfn004093	435.13	315.09	436.137	C21H24O10	[M-H]-	Phloretin-4'-O-glucoside (Trilobatin)	Flavonoids	Chalcones	803280	1582400	627340	2060600	235310	407230	478310	711300	1.17854
mws2118	435.13	166.7	436.137	C21H24O10	[M-H]-	Phloretin-2'-O-glucoside (Phlorizin)	Flavonoids	Chalcones	710110	951230	697670	1181400	136690	258810	484620	366350	1.32799
pmn001716	447.09	285.04	448.101	C21H20O11	[M-H]-	Carthamone	Flavonoids	Chalcones	1308800	1965500	796280	2787100	183080	631350	543990	611660	1.25609
Hmpn005101	451.12	289.07	452.131	C21H24O11	[M-H]-	Sieboldin	Flavonoids	Chalcones	55584	47284	37713	77889	23391	18699	29064	23947	1.40907
HJAP012	419.1	383.07	418.09	C20H18O10	[M+H]+	Luteolin-8-C-arabinoside	Flavonoids	Flavonoid carbonoside	19726	23328	21632	13764	43731	32414	33515	20644	1.10243
mws1434	431.1	311	432.106	C21H20O10	[M-H]-	Apigenin-6-C-glucoside (Isovitexin)*	Flavonoids	Flavonoid carbonoside	1143300	1175200	808330	2560100	442310	772980	813850	879650	1.03892
pme1611	433.11	313	434.121	C21H22O10	[M-H]-	Isohemiphloin	Flavonoids	Flavonoid carbonoside	3864400	6373700	2650300	8022500	705250	1608100	2329800	2335900	1.22802
Lmtp002822	535.14	499.12	534.137	C25H26O13	[M+H]+	Apigenin-6-C-arabinoside-8-C-xyloside*	Flavonoids	Flavonoid carbonoside	121810	124500	90254	135570	66504	91023	102400	98856	1.04308
Lmnp002584	625.18	463.13	624.169	C28H32O16	[M+H]+	Hispidulin-8-C-(2''-O-glucosyl)glucoside	Flavonoids	Flavonoid carbonoside	100860	86364	116000	75477	123900	155870	141180	162590	1.38113
HJAP026	625.18	463.13	624.17	C28H32O16	[M+H]+	Chrysoeriol-6-C-glucoside-4'-O-glucoside	Flavonoids	Flavonoid carbonoside	119200	79173	114300	91589	118660	150040	192690	162590	1.26298
MWSslk012	583.13	463.09	584.138	C25H28O16	[M-H]-	Neomangiferin	Flavonoids	Other Flavonoids	60793	53823	51898	68933	23236	33852	24806	38694	1.39844
pmb0069	122	105	121.053	C7H7NO	[M+H]+	Benzamide	Phenolic acids	Phenolic acids	924440	910520	961000	902200	937770	1032100	970080	1210300	1.03815
Lmbn001930	121.03	77.04	122.037	C7H6O2	[M-H]-	2-Hydroxybenzaldehyde (Salicylaldehyde)	Phenolic acids	Phenolic acids	9	9	9	9	25435	8174.7	27557	25435	1.57756
mws0628	121.03	92	122.037	C7H6O2	[M-H]-	4-Hydroxybenzaldehyde	Phenolic acids	Phenolic acids	154160	193550	181310	207950	138180	165810	139970	161120	1.11536
mws1078	138.06	92.1	137.048	C7H7NO2	[M+H]+	Anthranilic Acid	Phenolic acids	Phenolic acids	20871	9	9	9	41738	24665	58760	37944	1.27623
Zmgn004894	151.04	136.02	152.047	C8H8O3	[M-H]-	Methyl 4-hydroxybenzoate	Phenolic acids	Phenolic acids	22500	20063	14999	26268	9	23065	9	9	1.22869
pmb0142	165.1	95.2	164.047	C9H8O3	[M+H]+	Caffeic aldehyde	Phenolic acids	Phenolic acids	25874	30676	23761	22861	17506	18282	14655	20301	1.33634
NK10253223	168.06	94.06	167.058	C8H9NO3	[M+H]+	2-Amino-3-methoxybenzoic acid	Phenolic acids	Phenolic acids	100710	121310	107220	110480	9	9	9	9	1.58326
Hmbp001276	169.05	65.03	168.042	C8H8O4	[M+H]+	Gallacetophenone	Phenolic acids	Phenolic acids	8375600	9667400	8262800	9313700	4763200	7199000	5857700	6327400	1.36988
Lmmp003042	169.05	123.04	168.042	C8H8O4	[M+H]+	Protocatechuic Acid Methyl Ester	Phenolic acids	Phenolic acids	73408	68014	85943	80497	56756	56256	64194	61995	1.33704
MWSmce455	181.05	107.01	182.058	C9H10O4	[M-H]-	Vanillic acid methyl ester	Phenolic acids	Phenolic acids	15058	21877	20458	16976	11313	13444	13058	11234	1.38207
pmb2497	197	153	198.053	C9H10O5	[M-H]-	4-Hydroxy-3-methoxymandelate	Phenolic acids	Phenolic acids	216830	206380	212140	169020	238360	238310	229100	228530	1.17089
MWSmce675	271.08	108.02	272.09	C12H16O7	[M-H]-	Arbutin	Phenolic acids	Phenolic acids	117380	135310	122870	176830	60954	98517	106790	93282	1.20635
mws1521	285.1	121.03	286.105	C13H18O7	[M-H]-	Salicin	Phenolic acids	Phenolic acids	663780	726720	523160	987390	413130	392500	480210	509230	1.26405
Zmhn001358	299.08	137.02	300.084	C13H16O8	[M-H]-	4-O-Glucosyl-4-hydroxybenzoic acid*	Phenolic acids	Phenolic acids	3705600	3944400	4833700	4619600	2790700	3221100	2942500	3632700	1.26823
pmb3142	299.1	137.1	300.085	C13H16O8	[M-H]-	Salicylic acid-2-O-glucoside	Phenolic acids	Phenolic acids	1438700	1554700	1201600	2291100	632240	696130	769080	684280	1.474
Lmsn002247	299.08	137.02	300.085	C13H16O8	[M-H]-	1-O-Salicyloyl-β-D-glucose*	Phenolic acids	Phenolic acids	15022000	18018000	13699000	22259000	9086400	9070600	9468000	10461000	1.4381
Hmsn002598	301.09	139.04	302.1	C13H18O8	[M-H]-	Salirepin	Phenolic acids	Phenolic acids	23388	29861	24063	33776	35970	47144	55912	52569	1.35301
Lmhn003074	309.06	193.05	310.069	C14H14O8	[M-H]-	Feruloylmalic acid	Phenolic acids	Phenolic acids	54532	54207	68139	62933	51003	42292	46145	42694	1.33146
Lmmn002179	313.09	107.05	314.1	C14H18O8	[M-H]-	Methyl salicylate-2-O-glucoside	Phenolic acids	Phenolic acids	698060	766700	693310	758710	514660	555300	658030	711850	1.07565
pmb2871	315.07	153	316.079	C13H16O9	[M-H]-	1-O-Gentisoyl-β-D-glucoside	Phenolic acids	Phenolic acids	145460	165350	147740	204840	84639	82116	100260	97340	1.48295
Lmfp001509	317.09	153.02	316.079	C13H16O9	[M+H]+	1-O-Galloyl-rhamnose	Phenolic acids	Phenolic acids	465920	431440	471540	447890	580870	578140	570060	595510	1.56359
pmn001419	325.09	163.04	326.1	C15H18O8	[M-H]-	1-O-p-Coumaroyl-β-D-glucose	Phenolic acids	Phenolic acids	6000800	5954000	5349700	7242700	4290600	4264500	5184500	5324300	1.20974
Hmhn003067	325.09	119.05	326.1	C15H18O8	[M-H]-	Phenylpropionic acid-O-β-D-glucopyranoside	Phenolic acids	Phenolic acids	84030000	86529000	87026000	90137000	76384000	79787000	79438000	79214000	1.45441
Lmtn002233	327.11	165.05	328.116	C15H20O8	[M-H]-	Androsin	Phenolic acids	Phenolic acids	848410	868080	961640	1002000	856840	794930	768580	845410	1.09988
Lmmn003663	329.09	167.04	330.095	C14H18O9	[M-H]-	5-Glucosyloxy-2-Hydroxybenzoic acid methyl ester	Phenolic acids	Phenolic acids	699480	861970	623770	761610	524900	542600	512920	470510	1.44431
Zmhn001883	329.09	209.04	330.095	C14H18O9	[M-H]-	Vanillic acid-4-O-glucoside	Phenolic acids	Phenolic acids	5877500	6764500	6754100	8025300	4627500	6178400	5077100	5507400	1.19136
pmb3074	337.09	191.05	338.1	C16H18O8	[M-H]-	5-O-p-Coumaroylquinic acid*	Phenolic acids	Phenolic acids	326690	220990	119290	365290	92114	105100	116140	112520	1.26342
pmn001420	341.09	179.04	342.095	C15H18O9	[M-H]-	1-O-Caffeoyl-β-D-glucose*	Phenolic acids	Phenolic acids	50787000	54616000	45946000	51493000	41428000	39745000	47806000	46361000	1.16139
Zmhn001793	341.09	179.03	342.096	C15H18O9	[M-H]-	6-O-Caffeoyl-D-glucose*	Phenolic acids	Phenolic acids	30007000	34809000	37618000	41327000	24761000	30101000	29738000	30070000	1.1632
mws0906	341.12	179	342.131	C16H22O8	[M-H]-	Coniferin	Phenolic acids	Phenolic acids	48253000	57086000	51677000	53099000	42141000	43878000	45720000	43377000	1.42364
Zmln000899	343.11	181.05	344.111	C15H20O9	[M-H]-	Syringaldehyde-4-O-glucoside	Phenolic acids	Phenolic acids	1826200	1365100	1655900	836690	3379600	2065500	2316200	1762300	1.09718
mws2108	353.09	191.05	354.095	C16H18O9	[M-H]-	Cryptochlorogenic acid (4-O-Caffeoylquinic acid)	Phenolic acids	Phenolic acids	6934300	4578100	3114200	9819400	418740	1579300	2840300	1265000	1.27116
mws0178	353.09	191.01	354.095	C16H18O9	[M-H]-	Chlorogenic acid (3-O-Caffeoylquinic acid)	Phenolic acids	Phenolic acids	9569000	6573500	4300500	14688000	633330	2386200	3915400	1852500	1.26875
Lmsn003318	355.1	175.04	356.111	C16H20O9	[M-H]-	1-O-Feruloyl-β-D-glucose*	Phenolic acids	Phenolic acids	32329000	28973000	35583000	32574000	25148000	33290000	21536000	21471000	1.09092
mws0179	367.1	190.9	368.111	C17H20O9	[M-H]-	Chlorogenic acid methyl ester	Phenolic acids	Phenolic acids	155870	173260	149840	261940	29400	46729	75269	61642	1.44048
pmn001695	371.1	249.06	372.106	C16H20O10	[M-H]-	Trihydroxycinnamoylquinic acid	Phenolic acids	Phenolic acids	9	9	9	9	150510	159510	98912	137790	1.58305
Lmzn001983	375.13	135.05	376.137	C16H24O10	[M-H]-	D-Threo-guaiacylglycerol-7-O-β-D-glucoside	Phenolic acids	Phenolic acids	67503	78951	66449	77125	30545	49016	41944	64472	1.18967
Lmzn001582	387.17	207.1	388.174	C18H28O9	[M-H]-	5'-Glucosyloxyjasmanic acid	Phenolic acids	Phenolic acids	226790	205850	245420	206780	168740	162070	201400	213630	1.01215
Cmzn005251	433.11	271.06	434.121	C21H22O10	[M-H]-	6-O-Caffeoylarbutin	Phenolic acids	Phenolic acids	22223000	37867000	17234000	36049000	1936800	7120400	11224000	12843000	1.21602
pmb3072	481.14	319.3	482.142	C22H26O12	[M-H]-	3-O-p-Coumaroylshikimic acid-O-glucoside	Phenolic acids	Phenolic acids	36300	33307	32802	37415	9	30312	9	9	1.24893
pmb3066	481.14	319.2	482.142	C22H26O12	[M-H]-	5-O-p-Coumaroylshikimic acid O-glucoside	Phenolic acids	Phenolic acids	35830	81890	100700	105920	131650	118070	134320	139260	1.05893
pmb3064	499.15	163.2	500.153	C22H28O13	[M-H]-	3-O-p-Coumaroylquinic acid-O-glucoside	Phenolic acids	Phenolic acids	22356	18013	20970	15524	9	4629	9	9	1.34941
pmb3061	499.15	163.1	500.153	C22H28O13	[M-H]-	5-O-p-Coumaroylquinic acid O-glucoside	Phenolic acids	Phenolic acids	9538.9	9411.2	7890.1	11190	5352.9	7376.1	8321.7	6376	1.22255
Lmsn002288	503.14	341.09	504.148	C21H28O14	[M-H]-	1-O-Caffeoyl-(6-O-glucosyl)-β-D-glucose	Phenolic acids	Phenolic acids	1099000	1208600	1574200	1288800	795080	966430	891260	817540	1.38199
Lmsp003655	521.2	131.05	520.194	C26H32O11	[M+H]+	Dehydrodiconiferyl alcohol-gamma'-O-glucoside	Phenolic acids	Phenolic acids	44880	52517	65199	35014	63365	92291	54817	67318	1.03343
pmb0824	537.1	177.4	536.153	C25H28O13	[M+H]+	Syringic acid-4-O-(6''-feruloyl)glucoside	Phenolic acids	Phenolic acids	34374	40381	57769	45094	87475	74494	63018	81220	1.3982
pmn001743	685.23	523.2	686.242	C31H42O17	[M-H]-	Specnuezhenide	Phenolic acids	Phenolic acids	160790	129230	163650	127530	235870	242030	235940	193680	1.43174
Lmgn002253	695.2	353.09	696.19	C31H36O18	[M-H]-	Syringoylcaffeoylquinic acid-D-glucose	Phenolic acids	Phenolic acids	1004400	881980	532350	1982400	51904	240910	429440	192100	1.28151
Lmmn002274	521.2	359.15	522.21	C26H34O11	[M-H]-	Isolariciresinol-9'-O-glucoside	Lignans and Coumarins	Lignans	414380	367520	614900	479390	587320	523460	686500	565520	1.01067
Hmln002355	549.2	387.15	550.204	C27H34O12	[M-H]-	5'-Methoxymatairesinoside	Lignans and Coumarins	Lignans	163940	194150	181460	182530	221740	203310	194440	207910	1.23425
Lmmn002260	551.21	389.17	552.221	C27H36O12	[M-H]-	5'-Methoxyisolariciresinol-9'-O-glucoside	Lignans and Coumarins	Lignans	149830	105800	122390	152730	71106	51325	102490	63331	1.33621
Rfmb26201	621.22	417.16	622.226	C30H38O14	[M-H]-	Syringaresinol-4'-O-(6''-acetyl)glucoside	Lignans and Coumarins	Lignans	3173	9218.4	7586.5	14313	21826	14756	20524	21390	1.19728
Cmqn003939	741.26	501.17	742.268	C34H46O18	[M-H]-	liriodendrin;Syringaresinol-di-O-glucoside	Lignans and Coumarins	Lignans	15111	15011	12357	11811	23639	17825	18915	21434	1.39647
Lmdn004267	357.13	151.04	358.142	C20H22O6	[M-H]-	Epipinoresinol*	Lignans and Coumarins	Lignans	9	9	3654.8	9	4276.5	4201.8	4157.2	5413.2	1.27888
mws0097	357.13	151	358.142	C20H22O6	[M-H]-	Pinoresinol*	Lignans and Coumarins	Lignans	9	9546.4	9	9	7990.6	8601.3	7264.3	6850.4	1.1777
Cmpp003619	193.05	105.07	192.042	C10H8O4	[M+H]+	6,7-Dihydroxy-4-methylcoumarin	Lignans and Coumarins	Coumarins	81167	9	9	9	55716	46056	60774	54381	1.20052
MWSmce265	247.09	229.09	246.089	C14H14O4	[M+H]+	Decursinol	Lignans and Coumarins	Coumarins	9	9	9	9	23444	17455	27279	25267	1.58258
Lmbn001162	339.07	177.02	340.079	C15H16O9	[M-H]-	Esculetin-7-O-glucoside	Lignans and Coumarins	Coumarins	292620	462820	367650	373390	592150	603730	548180	622960	1.40654
mws1015	339.07	177	340.079	C15H16O9	[M-H]-	Esculin (6,7-DihydroxyCoumarin-6-glucoside)	Lignans and Coumarins	Coumarins	286920	450570	289860	400760	532100	547580	475260	545180	1.26221
Cmyn001328	339.07	177.02	340.079	C15H16O9	[M-H]-	Daphnin	Lignans and Coumarins	Coumarins	272790	478580	382530	431880	522660	577010	535610	610960	1.21858

## Sheet: Table S4C
Table S4C. Potential significant differential metabolites between N250 and N400
Index	Q1 (Da)	Q3 (Da)	Molecular Weight (Da)	Formula	Ionization model	Compounds	Class I	Class II	N250-1	N250-2	N250-3	N250-4	N400-1	N400-2	N400-3	N400-4	VIP
Lmyn006227	269.05	151	270.053	C15H10O5	[M-H]-	Galangin (3,5,7-Trihydroxyflavone)	Flavonoids	Flavones	6345.6	6106	3465.5	7495.3	11248	16694	5844.7	5213.7	1.12625
MWSHY0069	301.07	286.05	300.063	C16H12O6	[M+H]+	Hispidulin (5,7,4'-Trihydroxy-6-methoxyflavone)	Flavonoids	Flavones	223070	401050	435970	410100	128220	325260	132590	133460	1.74661
Zmhp003514	301.07	286.05	300.063	C16H12O6	[M+H]+	6,7,8-Tetrahydroxy-5-methoxyflavone	Flavonoids	Flavones	230580	415550	466600	438200	144820	326680	150980	138630	1.76415
MWSHY0009	301.07	286.05	300.063	C16H12O6	[M+H]+	Diosmetin (5,7,3'-Trihydroxy-4'-methoxyflavone)	Flavonoids	Flavones	222660	434910	448670	408210	137850	351030	139890	140880	1.68242
pmp000004	331.08	316.06	330.074	C17H14O7	[M+H]+	4',5,7-Trihydroxy-3',6-dimethoxyflavone (Jaceosidin)	Flavonoids	Flavones	23040	19055	22489	24840	5393.6	20359	6484	10827	1.7615
MWSHY0031	447.09	271.06	446.085	C21H18O11	[M+H]+	Apigenin-7-O-glucuronide	Flavonoids	Flavones	68937	151730	76881	95344	97242	56935	61910	43980	1.33217
pmp000577	461.12	285.08	460.116	C26H20O8	[M+H]+	Acacetin-7-O-glucuronide	Flavonoids	Flavones	9	47920	9	9	45572	48674	51157	18743	1.77856
pmb0571	565.16	271.6	564.148	C26H28O14	[M+H]+	Apigenin-7-O-(2''-glucosyl)arabinoside	Flavonoids	Flavones	649170	704150	575580	697510	699850	942710	719780	877090	1.62804
Zmxp002867	625.17	301.07	624.168	C28H32O16	[M+H]+	Chrysoeriol-5,7-di-O-glucoside	Flavonoids	Flavones	59151	75929	60271	109080	47545	55838	30366	92649	1.07878
Lmjp004941	301.07	286.05	300.063	C16H12O6	[M+H]+	Rhamnocitrin (7-Methylkaempferol)	Flavonoids	Flavonols	196500	364010	427340	417360	136090	328900	123190	122290	1.64253
mws0038	313.07	283	314.079	C17H14O6	[M-H]-	Kumatakenin	Flavonoids	Flavonols	3874.4	6566.4	7440.7	8378.7	3906.9	5777	3308.7	4961.5	1.34475
pmn001551	417.12	402.07	418.126	C21H22O9	[M-H]-	Natsudaidain (3-Hydroxy-3',4',5,6,7,8-hexamethoxyflavone)	Flavonoids	Flavonols	16720	21466	27223	26127	12614	24344	10856	16124	1.41036
Lmdp002969	481.1	319.06	480.09	C21H20O13	[M+H]+	Myricetin-3-O-galactoside	Flavonoids	Flavonols	121830	59866	99354	45943	9	62704	9	9	1.8153
MWSHY0137	273.08	153.02	272.068	C15H12O5	[M+H]+	Naringenin (5,7,4'-Trihydroxyflavanone)	Flavonoids	Flavanones	13502000	13496000	13532000	24937000	12113000	12016000	16279000	11461000	1.00723
pme3475	273.08	153	272.068	C15H12O5	[M+H]+	Butin; 7,3',4'-Trihydroxyflavanone	Flavonoids	Flavanones	8896300	8431800	9699100	17164000	8599200	6990100	8790600	7201100	1.33374
pme1662	287.08	167	286.084	C16H14O5	[M+H]+	5,4'-Dihydroxy-7-methoxyflavanone (Sakuranetin)	Flavonoids	Flavanones	3253.2	4447.5	2412.2	3473.8	9	9	9	9	2.3294
mws0064	287.06	135	288.063	C15H12O6	[M-H]-	Eriodictyol (5,7,3',4'-Tetrahydroxyflavanone)	Flavonoids	Flavanones	45638	32906	29971	58246	29591	36532	30103	34402	1.10138
mws0463	301.07	164	302.079	C16H14O6	[M-H]-	Hesperetin	Flavonoids	Flavanones	17215	18031	23185	37472	12656	15468	12253	9074.5	1.80574
mws1033	303.09	153.02	302.079	C16H14O6	[M+H]+	Homoeriodictyol	Flavonoids	Flavanones	54780	51286	47797	97969	43732	52118	41176	27020	1.42944
mws1454	477.14	315	478.148	C23H26O11	[M-H]-	Persicoside	Flavonoids	Flavanones	24008	23756	15631	16307	15676	9	9	9	1.84704
pmb2979	549.12	387.1	550.132	C25H26O14	[M-H]-	Hesperetin-7-O-(6''-malonyl)glucoside	Flavonoids	Flavanones	157960	54422	46279	205400	229970	206020	70951	235940	1.02123
mws0914	271.06	151	272.068	C15H12O5	[M-H]-	Pinobanksin	Flavonoids	Flavanonols	9857200	9273300	12565000	18072000	9564200	7747400	9707300	8591100	1.42937
mws0744	319.05	301	320.053	C15H12O8	[M-H]-	Dihydromyricetin (Ampelopsin)	Flavonoids	Flavanonols	9	9	9	9	10773	19062	25598	18103	2.33033
pme2960	273.08	153	272.068	C15H12O5	[M+H]+	Naringenin chalcone; 2',4,4',6'-Tetrahydroxychalcone	Flavonoids	Chalcones	41370000	38159000	47273000	63321000	38096000	27584000	37150000	36032000	1.58917
Lmsn003297	449.11	287.06	450.116	C21H22O11	[M-H]-	3,4,2',4',6'-Pentahydroxychalcone-4'-O-glucoside	Flavonoids	Chalcones	73956	79851	186840	90568	9	9	9	9	2.32955
Lmsn004797	451.12	167.03	452.132	C21H24O11	[M-H]-	3-Hydroxyphloretin-4'-O-glucoside	Flavonoids	Chalcones	97449	150640	164410	200260	78324	118650	87943	141310	1.35714
Lmtp002942	535.14	499.12	534.137	C25H26O13	[M+H]+	Apigenin-6,8-di-C-arabinoside*	Flavonoids	Flavonoid carbonoside	57984	76192	46554	68443	103850	101090	82612	76994	1.8038
mws1292	565.16	409.09	564.123	C26H28O14	[M+H]+	Isoschaftoside	Flavonoids	Flavonoid carbonoside	1100200	1068400	871090	1164100	1615400	2054200	1531300	1241800	1.90619
Lmtp002642	565.16	457.11	564.148	C26H28O14	[M+H]+	Apigenin-8-C-(2''-glucosyl)arabinoside	Flavonoids	Flavonoid carbonoside	3611000	3696700	3498700	3641300	3431000	5198100	3968500	4536500	1.38041
Lmtp002474	565.16	427.1	564.148	C26H28O14	[M+H]+	Apigenin-6-C-(2''-glucosyl)arabinoside	Flavonoids	Flavonoid carbonoside	2081900	1984700	1432200	1570900	2022000	2610200	2349300	2328900	1.7428
Lmnp102580	565.16	433.11	564.148	C26H28O14	[M+H]+	Apigenin-6-C-(2''-xylosyl)glucoside	Flavonoids	Flavonoid carbonoside	9	9	9	9	562070	642630	701810	679700	2.33294
pmp001111	579.17	561.16	578.164	C27H30O14	[M+H]+	Violanthin	Flavonoids	Flavonoid carbonoside	169210	134360	119260	127080	63544	111200	94768	119300	1.5768
mws1073	595.17	457.2	594.158	C27H30O15	[M+H]+	Apigenin-6,8-di-C-glucoside (Vicenin-2)	Flavonoids	Flavonoid carbonoside	10706000	9250800	8994400	10577000	9429700	11605000	12304000	11000000	1.27004
pmp001106	595.17	577.16	594.158	C27H30O15	[M+H]+	Vitexin-2''-O-glucoside	Flavonoids	Flavonoid carbonoside	1474300	1278400	1373700	1483700	1241700	1743000	1740100	1653600	1.15643
Lmnp002584	625.18	463.13	624.169	C28H32O16	[M+H]+	Hispidulin-8-C-(2''-O-glucosyl)glucoside	Flavonoids	Flavonoid carbonoside	165220	162540	146810	185990	123900	155870	141180	162590	1.27776
Lmbn001930	121.03	77.04	122.037	C7H6O2	[M-H]-	2-Hydroxybenzaldehyde (Salicylaldehyde)	Phenolic acids	Phenolic acids	9	9	9	9	25435	8174.7	27557	25435	2.32171
mws0628	121.03	92	122.037	C7H6O2	[M-H]-	4-Hydroxybenzaldehyde	Phenolic acids	Phenolic acids	146970	156420	176170	171450	138180	165810	139970	161120	1.00426
mws1078	138.06	92.1	137.048	C7H7NO2	[M+H]+	Anthranilic Acid	Phenolic acids	Phenolic acids	9	9	9	9	41738	24665	58760	37944	2.32953
pme2828	140	99	139.027	C6H5NO3	[M+H]+	4-Nitrophenol	Phenolic acids	Phenolic acids	8476200	8102700	8808700	7065300	7209500	7075400	6512200	6971900	1.78661
MWS1875	143.05	115.05	144.058	C10H8O	[M-H]-	2-Naphthol*	Phenolic acids	Phenolic acids	2216.6	3795.7	3529.2	3057.6	3405	1395	2028.3	1992.4	1.38497
Zmgn004894	151.04	136.02	152.047	C8H8O3	[M-H]-	Methyl 4-hydroxybenzoate	Phenolic acids	Phenolic acids	21295	20385	31186	26919	9	23065	9	9	1.80527
pmf0440	163.08	91.1	162.068	C10H10O2	[M+H]+	4-MethoxycinnaMaldehyde	Phenolic acids	Phenolic acids	54256	38812	56505	59464	60691	48720	71532	76923	1.20588
Zmhn001420	165.02	121.03	166.027	C8H6O4	[M-H]-	5,7-Dihydroxy-1(3H)-isobenzofuranone	Phenolic acids	Phenolic acids	176540	148900	182050	146940	163180	184160	179040	192180	1.20189
Lmrn003000	165.06	103.06	166.063	C9H10O3	[M-H]-	2-Hydroxy-3-phenylpropanoic acid	Phenolic acids	Phenolic acids	11490	9	9	9	10750	7815.4	8347.6	4741.6	1.74462
NK10253223	168.06	94.06	167.058	C8H9NO3	[M+H]+	2-Amino-3-methoxybenzoic acid	Phenolic acids	Phenolic acids	36798	41722	40910	52945	9	9	9	9	2.33227
Hmbp001276	169.05	65.03	168.042	C8H8O4	[M+H]+	Gallacetophenone	Phenolic acids	Phenolic acids	5682500	7718500	7540300	8331200	4763200	7199000	5857700	6327400	1.26787
mws0028	167.03	108.02	168.042	C8H8O4	[M-H]-	Vanillic acid	Phenolic acids	Phenolic acids	9	38473	9	9	9	40465	15149	59672	1.16142
Lmmp003042	169.05	123.04	168.042	C8H8O4	[M+H]+	Protocatechuic Acid Methyl Ester	Phenolic acids	Phenolic acids	71043	68605	52632	74300	56756	56256	64194	61995	1.02189
mws1200	177	145	178.063	C10H10O3	[M-H]-	Trans-4-Hydroxycinnamic Acid Methyl Ester	Phenolic acids	Phenolic acids	3344.7	1368.9	1030.6	6026	4737.6	4211.9	4047.3	3161.5	1.10937
MWSmce455	181.05	107.01	182.058	C9H10O4	[M-H]-	Vanillic acid methyl ester	Phenolic acids	Phenolic acids	12255	18025	13954	18306	11313	13444	13058	11234	1.51944
pmb2497	197	153	198.053	C9H10O5	[M-H]-	4-Hydroxy-3-methoxymandelate	Phenolic acids	Phenolic acids	270060	253020	294800	279600	238360	238310	229100	228530	2.07006
pmn001669	237.08	147	238.084	C12H14O5	[M-H]-	Methyl sinapate	Phenolic acids	Phenolic acids	14056	19245	17718	22910	13460	10514	15935	13080	1.66021
pmp000086	269.1	177.05	268.095	C13H16O6	[M+H]+	1-Feruloyl-sn-glycerol*	Phenolic acids	Phenolic acids	42504	67550	77474	82124	90615	91913	80904	62413	1.02317
pmp000087	269.1	177.05	268.095	C13H16O6	[M+H]+	2-Feruloyl-sn-glycerol*	Phenolic acids	Phenolic acids	42504	67550	77474	82124	90615	91913	80904	62413	1.02317
Lmxp011770	279.16	149.02	278.152	C16H22O4	[M+H]+	Diisobutyl phthalate*	Phenolic acids	Phenolic acids	11841000	10487000	9758100	10673000	12385000	11782000	11518000	11268000	1.52859
Lmln001195	297.1	135.07	298.105	C14H18O7	[M-H]-	Picein (4-Acetylphenyl-glucoside)	Phenolic acids	Phenolic acids	5578.8	6791.2	12033	11165	5347.9	3714.6	9737.1	4638.2	1.25042
Hmsn002598	301.09	139.04	302.1	C13H18O8	[M-H]-	Salirepin	Phenolic acids	Phenolic acids	39041	29182	39812	44772	35970	47144	55912	52569	1.33227
Lmhn003074	309.06	193.05	310.069	C14H14O8	[M-H]-	Feruloylmalic acid	Phenolic acids	Phenolic acids	54352	58209	77979	80425	51003	42292	46145	42694	1.92369
Lmsn002887	311.08	163.04	312.085	C14H16O8	[M-H]-	1-O-Caffeoyl xylose	Phenolic acids	Phenolic acids	43028	52344	30697	16917	12766	24368	17025	23817	1.42746
Lmqp002761	313.14	151.08	312.136	C19H20O4	[M+H]+	Alnusonol	Phenolic acids	Phenolic acids	869830	1137000	1309500	1199500	674760	1049400	786630	933480	1.50648
Lmmn002179	313.09	107.05	314.1	C14H18O8	[M-H]-	Methyl salicylate-2-O-glucoside	Phenolic acids	Phenolic acids	476490	638260	472660	458690	514660	555300	658030	711850	1.30847
pmn001367	315.07	153.02	316.079	C13H16O9	[M-H]-	Protocatechuic acid-4-O-glucoside	Phenolic acids	Phenolic acids	2829300	3023100	3192700	3324500	2756100	3453800	4296300	4609000	1.23253
Jmwn002172	315.11	135.04	316.116	C14H20O8	[M-H]-	3,4-dihydroxyphenylethanol-β-D-glucopyranoside	Phenolic acids	Phenolic acids	128950	124810	132180	123220	116280	145860	160370	162710	1.32035
Lmmn003663	329.09	167.04	330.095	C14H18O9	[M-H]-	5-Glucosyloxy-2-Hydroxybenzoic acid methyl ester	Phenolic acids	Phenolic acids	593340	565270	564350	630020	524900	542600	512920	470510	1.89745
Zmhn001883	329.09	209.04	330.095	C14H18O9	[M-H]-	Vanillic acid-4-O-glucoside	Phenolic acids	Phenolic acids	6021600	7238100	7485700	7465500	4627500	6178400	5077100	5507400	1.89779
pmn001518	331.07	169.01	332.074	C13H16O10	[M-H]-	1-O-Galloyl-β-D-glucose	Phenolic acids	Phenolic acids	180060	192950	206700	219650	232900	288320	183950	252660	1.29769
Hmln000873	331.07	169.01	332.075	C13H16O10	[M-H]-	2-O-Galloyl-D-glucose	Phenolic acids	Phenolic acids	180060	192950	206700	219650	232900	288320	183950	252660	1.29769
pmb3074	337.09	191.05	338.1	C16H18O8	[M-H]-	5-O-p-Coumaroylquinic acid*	Phenolic acids	Phenolic acids	103010	131710	140680	183880	92114	105100	116140	112520	1.4553
pmn001421	337.09	191.05	338.1	C16H18O8	[M-H]-	3-O-p-Coumaroylquinic acid*	Phenolic acids	Phenolic acids	142800	54977	119900	756920	5725.2	49653	294730	33585	1.14913
pma0149	341.08	207.07	340.079	C15H16O9	[M+H]+	Sinapoyl malate	Phenolic acids	Phenolic acids	5636400	6000100	5540100	5923300	7192200	5218500	6979500	7451300	1.30851
Jmyn002224	357.12	135.04	358.126	C16H22O9	[M-H]-	glucoacetosyringone	Phenolic acids	Phenolic acids	9598.9	10081	22661	21860	20286	21619	24635	21475	1.30017
pmn001695	371.1	249.06	372.106	C16H20O10	[M-H]-	Trihydroxycinnamoylquinic acid	Phenolic acids	Phenolic acids	9	9	9	9	150510	159510	98912	137790	2.33169
pmb0108	375.2	137.1	374.1	C19H18O8	[M+H]+	Feruloyl syringic acid	Phenolic acids	Phenolic acids	210050	182540	114670	197820	195920	87944	133090	97682	1.22585
Lmzn001582	387.17	207.1	388.174	C18H28O9	[M-H]-	5'-Glucosyloxyjasmanic acid	Phenolic acids	Phenolic acids	244750	189110	224710	241760	168740	162070	201400	213630	1.52565
Lmwp011196	391.28	149.02	390.277	C24H38O4	[M+H]+	Bis(2-ethylhexyl)phthalate*	Phenolic acids	Phenolic acids	1134200	1146900	1396300	1066100	1139700	938120	829840	1112100	1.38659
Lmmp010562	391.28	149.02	390.277	C24H38O4	[M+H]+	Diisooctyl Phthalate*	Phenolic acids	Phenolic acids	1134200	1146900	1396300	1066100	1139700	938120	829840	1112100	1.38659
Cmbp005948	401.12	163.04	400.116	C21H20O8	[M+H]+	1-O-p-Hydroxycinnamoyl-3-O-caffeoylglycerol	Phenolic acids	Phenolic acids	150350	261120	255490	237160	186000	294720	364440	327120	1.0963
Lmtn002324	431.15	269.1	432.163	C19H28O11	[M-H]-	Benzyl-(2''-O-glucosyl)glucoside*	Phenolic acids	Phenolic acids	31104	34437	36371	38817	19978	17249	9	28312	1.07546
pmb2654	460.1	117.9	461.153	C19H27NO12	[M-H]-	Anthranilate-1-O-Sophoroside	Phenolic acids	Phenolic acids	2882200	2560400	2584500	2993000	2679100	2867800	3949200	3353100	1.24391
pmb3072	481.14	319.3	482.142	C22H26O12	[M-H]-	3-O-p-Coumaroylshikimic acid-O-glucoside	Phenolic acids	Phenolic acids	27929	22717	34283	29990	9	30312	9	9	1.78999
pmb3066	481.14	319.2	482.142	C22H26O12	[M-H]-	5-O-p-Coumaroylshikimic acid O-glucoside	Phenolic acids	Phenolic acids	109650	106450	119370	105700	131650	118070	134320	139260	1.94879
Lmsp003655	521.2	131.05	520.194	C26H32O11	[M+H]+	Dehydrodiconiferyl alcohol-gamma'-O-glucoside	Phenolic acids	Phenolic acids	38953	65853	75071	44472	63365	92291	54817	67318	1.03438
pmb2819	665.1	218.1	666.201	C27H38O19	[M-H]-	O-Caffeoyl maltotriose	Phenolic acids	Phenolic acids	2968.8	6717.9	6183.2	3930.8	6102.4	6999.8	5104.9	7626.6	1.18823
Hmln002355	549.2	387.15	550.204	C27H34O12	[M-H]-	5'-Methoxymatairesinoside	Lignans and Coumarins	Lignans	174310	170050	179670	228330	221740	203310	194440	207910	1.13726
Rfmb26201	621.22	417.16	622.226	C30H38O14	[M-H]-	Syringaresinol-4'-O-(6''-acetyl)glucoside	Lignans and Coumarins	Lignans	11096	12186	15609	17259	21826	14756	20524	21390	1.64034
Lmdn004267	357.13	151.04	358.142	C20H22O6	[M-H]-	Epipinoresinol*	Lignans and Coumarins	Lignans	5926.2	9234.9	6604.6	8232.4	4276.5	4201.8	4157.2	5413.2	2.0147
mws0097	357.13	151	358.142	C20H22O6	[M-H]-	Pinoresinol*	Lignans and Coumarins	Lignans	13190	6360.8	10406	10997	7990.6	8601.3	7264.3	6850.4	1.26236
MWSmce265	247.09	229.09	246.089	C14H14O4	[M+H]+	Decursinol	Lignans and Coumarins	Coumarins	14466	11821	26144	20280	23444	17455	27279	25267	1.15615
Lmbn001162	339.07	177.02	340.079	C15H16O9	[M-H]-	Esculetin-7-O-glucoside	Lignans and Coumarins	Coumarins	551180	429700	451180	467840	592150	603730	548180	622960	1.94213
Cmyn001328	339.07	177.02	340.079	C15H16O9	[M-H]-	Daphnin	Lignans and Coumarins	Coumarins	504660	469950	491000	426900	522660	577010	535610	610960	1.88588
mws4102	365.1	350.3	366.11	C21H18O6	[M-H]-	Isoglycyrol	Lignans and Coumarins	Coumarins	5734.3	7755.4	8819.5	8894.3	2475.9	6930.8	4810.9	6546	1.37317
Hmhp004269	409.15	229.09	408.141	C20H24O9	[M+H]+	Nodakenin	Lignans and Coumarins	Coumarins	93864	105170	63654	111050	124260	131230	98796	133130	1.45624
mad1424	427.05	295.05	426.043	C17H14O13	[M+H]+	Ditartaroyl-hydroxycoumarin	Lignans and Coumarins	Coumarins	459460	501390	545740	515970	542200	518580	571120	509020	1.09921

## Sheet: Table S5A
Table S5A. Significantly differential metabolites between N0 and N250
Index	Compounds	Class I	Class II	VIP	p_value	FDR	Fold_Change	Log2FC	Type	cpd_ID	kegg_map
Lmyn006227	Galangin (3,5,7-Trihydroxyflavone)	Flavonoids	Flavones	1.16316	0.0340143	0.11858	0.655193	-0.610008	down	C10044	ko00941
pmp000004	4',5,7-Trihydroxy-3',6-dimethoxyflavone (Jaceosidin)	Flavonoids	Flavones	1.47653	0.000262195	0.0260092	2.23366	1.15941	up	--	--
mws0072	Apigenin-5-O-glucoside	Flavonoids	Flavones	1.32083	0.0262096	0.108456	0.47644	-1.06963	down	--	--
MWSHY0080	Luteolin-7-O-neohesperidoside (Lonicerin)	Flavonoids	Flavones	1.32084	0.0340888	0.11858	0.287565	-1.79804	down	C12630	ko00944
Hmpp002612	Luteolin-7-O-gentiobioside	Flavonoids	Flavones	1.35087	0.030532	0.111977	0.429819	-1.2182	down	--	--
Zmxp002867	Chrysoeriol-5,7-di-O-glucoside	Flavonoids	Flavones	1.19979	0.0220972	0.0996421	0.619979	-0.689708	down	--	--
Hmqp003435	Apigenin-7-O-(2''-O-apiosyl)(6''-Malonyl)glucoside	Flavonoids	Flavones	1.42157	0.00131172	0.0411054	0.765069	-0.386338	down	C05622	ko00944
Hmqp003184	Luteolin-7-O-(6''-malonyl)glucoside-5-O-arabinoside	Flavonoids	Flavones	1.15018	0.025295	0.108456	0.719541	-0.474852	down	--	--
pmn001551	Natsudaidain (3-Hydroxy-3',4',5,6,7,8-hexamethoxyflavone)	Flavonoids	Flavonols	1.43709	0.0146677	0.0881329	2.01006	1.00724	up	--	--
mws0856	Quercetin-4'-O-glucoside (Spiraeoside)	Flavonoids	Flavonols	1.05887	0.0362872	0.123784	0.461551	-1.11544	down	--	--
Lmjp003295	6-Methoxykaempferol-3-O-glucoside	Flavonoids	Flavonols	1.23065	0.030581	0.111977	0.604578	-0.726	down	--	--
Lmjp002906	Rhamnetin-3-O-Glucoside*	Flavonoids	Flavonols	1.14897	0.0246855	0.107564	0.599918	-0.737164	down	--	--
pmb0565	Syringetin-3-O-glucoside	Flavonoids	Flavonols	1.43269	0.00373214	0.0548776	0.677084	-0.562594	down	--	--
MWSslk254	Kaempferol-3-O-glucorhamnoside*	Flavonoids	Flavonols	1.31457	0.0498835	0.15089	0.287392	-1.79891	down	--	--
Lmjp002867	Kaempferol-3-O-neohesperidoside*	Flavonoids	Flavonols	1.37656	0.0310496	0.112845	0.248066	-2.0112	down	--	--
MWSHY0050	Kaempferol-3-O-rutinoside(Nicotiflorin)*	Flavonoids	Flavonols	1.35552	0.0277884	0.108456	0.27385	-1.86854	down	C21833	ko00944,ko01110
Lmbp002592	Kaempferol-3,7-O-diglucoside	Flavonoids	Flavonols	1.34412	0.0318278	0.114816	0.445151	-1.16763	down	--	--
HJAP120	Rhamnetin-3-O-Rutinoside*	Flavonoids	Flavonols	1.2322	0.0265609	0.108456	0.435599	-1.19893	down	--	--
Lmsp004721	Tamarixetin-3-O-glucoside-7-O-rhamnoside	Flavonoids	Flavonols	1.28287	0.0196494	0.0956924	0.409542	-1.28792	down	--	--
MWSHY0135	Isorhamnetin-3-O-rutinoside (Narcissin)*	Flavonoids	Flavonols	1.16319	0.0363473	0.123784	0.462205	-1.11339	down	--	--
Lmmp002463	Sexangularetin-3-O-glucoside-7-O-rhamnoside	Flavonoids	Flavonols	1.23294	0.0380187	0.126652	0.470884	-1.08656	down	--	--
Lmmp002963	6-C-Methylquercetin-3-O-rutinoside	Flavonoids	Flavonols	1.27687	0.0274984	0.108456	0.44396	-1.1715	down	--	--
MWSHY0064	Isorhamnetin-3-O-neohesperidoside*	Flavonoids	Flavonols	1.27632	0.0113115	0.0798361	0.399917	-1.32223	down	--	--
Hmcp001629	Kaempferol-3-O-(6''-Malonyl)glucoside-7-O-Glucoside	Flavonoids	Flavonols	1.27917	0.0203954	0.0966871	0.402487	-1.31299	down	--	--
Hmcp001618	Quercetin-3-O-(2''-O-Xylosyl)rutinoside	Flavonoids	Flavonols	1.42081	0.00286967	0.0517604	0.587813	-0.766571	down	C10175	ko00944
pmp001105	Kaempferol-3-O-neohesperidoside-7-O-glucoside	Flavonoids	Flavonols	1.33828	0.0173348	0.0927696	0.50532	-0.984731	down	--	--
mws0034	Epigallocatechin-3-gallate	Flavonoids	Flavanols	1.22491	0.0082238	0.070263	6.12619	2.61499	up	C09731	--
Hmcp001329	Quercetin-3-O-xylosyl(1→2)glucosyl(1→2)glucoside	Flavonoids	Flavonols	1.46888	0.00111936	0.0389376	0.663513	-0.591803	down	--	--
MWSHY0137	Naringenin (5,7,4'-Trihydroxyflavanone)	Flavonoids	Flavanones	1.24108	0.0203336	0.0966871	0.590154	-0.760836	down	C00509	ko00941,ko00943,ko01100,ko01110
pme1662	5,4'-Dihydroxy-7-methoxyflavanone (Sakuranetin)	Flavonoids	Flavanones	1.55912	0.00393522	0.0548776	377.408	8.55998	up	C09833	ko00941,ko01110
mws0064	Eriodictyol (5,7,3',4'-Tetrahydroxyflavanone)	Flavonoids	Flavanones	1.35993	0.00507133	0.0588032	0.483316	-1.04896	down	C05631	ko00941,ko01100,ko01110
mws1564	Farrerol (6,8-Dimethyl-5,7,4'-trihydroxyflavanone)	Flavonoids	Flavanones	1.47837	0.00148086	0.0411054	0.602783	-0.730289	down	C09734	--
Zmhn001036	Choerospondin	Flavonoids	Flavanones	1.2732	0.0273278	0.108456	0.271617	-1.88036	down	--	--
HJN090	Butin-7-O-glucoside	Flavonoids	Flavanones	1.19374	0.0391076	0.126969	0.421514	-1.24635	down	--	--
MWS20145	Eriodictyol-7-O-glucoside	Flavonoids	Flavanones	1.56077	0.000796638	0.0323302	10064.1	13.2969	up	--	--
pmb3023	Eriodictyol-8-C-glucoside	Flavonoids	Flavanones	1.3928	0.0230074	0.10186	0.279947	-1.83678	down	--	--
HJN086	Eriodictyol-3'-O-glucoside	Flavonoids	Flavanones	1.27881	0.0417563	0.132911	0.4561	-1.13258	down	--	--
Jmgn004021	6-C-Glucosyl-2-Hydroxynaringenin	Flavonoids	Flavanones	1.39453	0.0255944	0.108456	0.230494	-2.1172	down	--	--
Lmzp002365	Hesperetin-7-O-glucoside	Flavonoids	Flavanones	1.41645	0.00338409	0.053163	0.625048	-0.677961	down	C16422	ko00941
pme1598	Hesperetin-5-O-glucoside	Flavonoids	Flavanones	1.28974	0.0163973	0.0897245	0.508823	-0.974764	down	--	--
mws1454	Persicoside	Flavonoids	Flavanones	1.55923	0.00319528	0.0518701	2213.94	11.1124	up	--	--
pmb0686	Eriodictyol-7-O-(6''-malonyl)glucoside	Flavonoids	Flavanones	1.2299	0.0434161	0.136411	0.416166	-1.26477	down	--	--
mws0914	Pinobanksin	Flavonoids	Flavanonols	1.32993	0.00411134	0.0548776	0.493666	-1.01839	down	C09826	ko00941
Lmtn002796	Aromadendrin-7-O-glucoside	Flavonoids	Flavanonols	1.40154	0.0247375	0.107564	0.257505	-1.95733	down	--	--
pme2960	Naringenin chalcone; 2',4,4',6'-Tetrahydroxychalcone	Flavonoids	Chalcones	1.27821	0.011123	0.0796605	0.645344	-0.631859	down	C06561	ko00941,ko01100,ko01110
pme1201	Phloretin	Flavonoids	Chalcones	1.40559	0.0141242	0.0881329	0.405765	-1.30128	down	C00774	ko00941,ko01110
HJN055	Dihydrocharcone-4'-O-glucoside	Flavonoids	Chalcones	1.45106	0.0149257	0.0881329	0.266292	-1.90892	down	--	--
mws2118	Phloretin-2'-O-glucoside (Phlorizin)	Flavonoids	Chalcones	1.43257	0.00810008	0.070263	0.31728	-1.65617	down	C01604	ko00941,ko01110
Lmsn003297	3,4,2',4',6'-Pentahydroxychalcone-4'-O-glucoside	Flavonoids	Chalcones	1.56027	0.0269851	0.108456	11978.2	13.5481	up	C16408	ko00941
Hmpn005101	Sieboldin	Flavonoids	Chalcones	1.3225	0.0187051	0.0934762	0.356571	-1.48774	down	--	--
pma6218	O-MethylNaringenin-8-C-arabinoside	Flavonoids	Flavonoid carbonoside	1.22083	0.0300378	0.111667	1.47852	0.56415	up	--	--
mws1292	Isoschaftoside	Flavonoids	Flavonoid carbonoside	1.21838	0.0383171	0.126652	0.726432	-0.4611	down	--	--
Lmnp102580	Apigenin-6-C-(2''-xylosyl)glucoside	Flavonoids	Flavonoid carbonoside	1.56146	0.00172883	0.0420971	1.36633e-05	-16.1593	down	--	--
Zmjp003031	Orientin-2''-O-galactoside	Flavonoids	Flavonoid carbonoside	1.27875	0.0409994	0.13223	0.557642	-0.842589	down	--	--
Lmnp002584	Hispidulin-8-C-(2''-O-glucosyl)glucoside	Flavonoids	Flavonoid carbonoside	1.42574	0.00107806	0.0389376	1.74428	0.80263	up	--	--
HJAP026	Chrysoeriol-6-C-glucoside-4'-O-glucoside	Flavonoids	Flavonoid carbonoside	1.39256	0.0058957	0.0600213	1.753	0.809823	up	--	--
MWSslk012	Neomangiferin	Flavonoids	Other Flavonoids	1.34338	0.00615754	0.0611985	0.597621	-0.742698	down	--	--
pmb0069	Benzamide	Phenolic acids	Phenolic acids	1.43435	0.00182391	0.0422975	1.09859	0.135649	up	C09815	--
pmp001285	Phthalic anhydride	Phenolic acids	Phenolic acids	1.32728	0.00940601	0.0747147	0.808591	-0.306517	down	--	--
pmb0142	Caffeic aldehyde	Phenolic acids	Phenolic acids	1.31443	0.0153018	0.0881329	0.703573	-0.507229	down	C10945	ko00940,ko01110
NK10253223	2-Amino-3-methoxybenzoic acid	Phenolic acids	Phenolic acids	1.51878	2.66854e-05	0.0129958	0.392011	-1.35103	down	C05831	ko00380
pmb2497	4-Hydroxy-3-methoxymandelate	Phenolic acids	Phenolic acids	1.38299	0.00222581	0.0492712	1.3644	0.448263	up	C05584	ko00350,ko01100
MWSmce675	Arbutin	Phenolic acids	Phenolic acids	1.30886	0.0216539	0.099141	0.621358	-0.686503	down	C06186	ko00010
MWSmce341	Butyl isobutyl phthalate*	Phenolic acids	Phenolic acids	1.14609	0.0429625	0.135862	0.874861	-0.192874	down	--	--
Lmlp012720	Dibutyl phthalate*	Phenolic acids	Phenolic acids	1.29302	0.0155311	0.0881329	0.899428	-0.15292	down	C14214	--
pmb3142	Salicylic acid-2-O-glucoside	Phenolic acids	Phenolic acids	1.33346	0.0325726	0.11614	0.489784	-1.02978	down	--	--
Lmsn002247	1-O-Salicyloyl-β-D-glucose*	Phenolic acids	Phenolic acids	1.3904	0.0168348	0.0910952	0.521719	-0.938654	down	--	--
Hmsn002598	Salirepin	Phenolic acids	Phenolic acids	1.12781	0.0464838	0.144189	1.37555	0.460008	up	--	--
Lmmn002179	Methyl salicylate-2-O-glucoside	Phenolic acids	Phenolic acids	1.37128	0.00845542	0.0708551	0.701493	-0.5115	down	--	--
pmb2871	1-O-Gentisoyl-β-D-glucoside	Phenolic acids	Phenolic acids	1.41145	0.00489855	0.0581852	0.530985	-0.913258	down	--	--
Lmfp001509	1-O-Galloyl-rhamnose	Phenolic acids	Phenolic acids	1.3964	0.013249	0.0881329	1.23401	0.303356	up	--	--
pmn001367	Protocatechuic acid-4-O-glucoside	Phenolic acids	Phenolic acids	1.37655	0.00283763	0.0517604	0.809529	-0.304846	down	--	--
Hmhn003067	Phenylpropionic acid-O-β-D-glucopyranoside	Phenolic acids	Phenolic acids	1.25671	0.018833	0.0934762	0.899141	-0.153381	down	--	--
Jmwn002620	Vanillic Acid-4-O-Glucuronide	Phenolic acids	Phenolic acids	1.14544	0.0384898	0.126652	1.13827	0.186841	up	--	--
mws0179	Chlorogenic acid methyl ester	Phenolic acids	Phenolic acids	1.40103	0.0151517	0.0881329	0.37215	-1.42604	down	--	--
Lmzn001983	D-Threo-guaiacylglycerol-7-O-β-D-glucoside	Phenolic acids	Phenolic acids	1.35249	0.0055075	0.0600213	0.658367	-0.603035	down	--	--
Lmtn002324	Benzyl-(2''-O-glucosyl)glucoside*	Phenolic acids	Phenolic acids	1.26534	0.0104278	0.077636	1.98983	0.992648	up	C17564	--
Cmzn005251	6-O-Caffeoylarbutin	Phenolic acids	Phenolic acids	1.30248	0.0183933	0.0933077	0.272427	-1.87606	down	--	--
pmb3064	3-O-p-Coumaroylquinic acid-O-glucoside	Phenolic acids	Phenolic acids	1.31812	0.000125486	0.0203705	0.0585249	-4.09481	down	--	--
Lmsn002288	1-O-Caffeoyl-(6-O-glucosyl)-β-D-glucose	Phenolic acids	Phenolic acids	1.09471	0.0472916	0.145766	0.748122	-0.418654	down	--	--
pmb0824	Syringic acid-4-O-(6''-feruloyl)glucoside	Phenolic acids	Phenolic acids	1.42824	0.00135349	0.0411054	1.82839	0.870574	up	--	--
pmn001743	Specnuezhenide	Phenolic acids	Phenolic acids	1.22222	0.0288024	0.109584	1.40982	0.495516	up	--	--
Lmmn002260	5'-Methoxyisolariciresinol-9'-O-glucoside	Lignans and Coumarins	Lignans	1.05861	0.0378905	0.136158	0.665649	-0.587167	down	--	--
Cmqn003939	liriodendrin;Syringaresinol-di-O-glucoside	Lignans and Coumarins	Lignans	1.30405	0.0155936	0.107634	1.51798	0.60215	up	--	--
Lmdn004267	Epipinoresinol*	Lignans and Coumarins	Lignans	1.26227	0.0016037	0.043014	8.14767	3.02639	up	--	--
mws0097	Pinoresinol*	Lignans and Coumarins	Lignans	1.1906	0.0377632	0.136158	4.27787	2.09689	up	C05366	ko00998,ko01100,ko01110
MWSmce265	Decursinol	Lignans and Coumarins	Coumarins	1.53657	0.0107255	0.0970046	2019.75	10.98	up	C09259	--
mws1015	Esculin (6,7-DihydroxyCoumarin-6-glucoside)	Lignans and Coumarins	Coumarins	1.17339	0.0326717	0.130227	1.42722	0.51321	up	C09264	--

## Sheet: Table S5B
Table S5B. Significantly differential metabolites between N0 and N400
Index	Compounds	Class I	Class II	VIP	p_value	FDR	Fold_Change	Log2FC	Type	cpd_ID	kegg_map
pmp000577	Acacetin-7-O-glucuronide	Flavonoids	Flavones	1.63617	0.0120912	0.0959497	4559.61	12.1547	up	--	--
MWSHY0080	Luteolin-7-O-neohesperidoside (Lonicerin)	Flavonoids	Flavones	1.38656	0.0336225	0.143846	0.274443	-1.86542	down	C12630	ko00944
Hmpp002612	Luteolin-7-O-gentiobioside	Flavonoids	Flavones	1.39472	0.0217187	0.128566	0.383225	-1.38374	down	--	--
Zmxp002867	Chrysoeriol-5,7-di-O-glucoside	Flavonoids	Flavones	1.31648	0.00791094	0.0841492	0.461064	-1.11696	down	--	--
Hmqp003184	Luteolin-7-O-(6''-malonyl)glucoside-5-O-arabinoside	Flavonoids	Flavones	1.24638	0.0222116	0.128566	0.758829	-0.398153	down	--	--
mws0038	Kumatakenin	Flavonoids	Flavonols	1.33963	0.0116843	0.0942405	0.578786	-0.788899	down	--	--
mws2627	Tamarixetin (3,3',5,7-Tetrahydroxy-4'-Methoxyflavone)	Flavonoids	Flavonols	1.33632	0.0424938	0.158386	0.760837	-0.39434	down	C10188	--
pmp001309	6-Hydroxykaempferol-7-O-glucoside	Flavonoids	Flavonols	1.18535	0.0363212	0.147686	0.678091	-0.560448	down	--	--
Lmjp002906	Rhamnetin-3-O-Glucoside*	Flavonoids	Flavonols	1.21745	0.0221381	0.128566	0.630344	-0.665789	down	--	--
MWSslk254	Kaempferol-3-O-glucorhamnoside*	Flavonoids	Flavonols	1.36065	0.0490676	0.171215	0.281139	-1.83065	down	--	--
Lmjp002867	Kaempferol-3-O-neohesperidoside*	Flavonoids	Flavonols	1.38793	0.0345977	0.144255	0.276667	-1.85378	down	--	--
MWSHY0050	Kaempferol-3-O-rutinoside(Nicotiflorin)*	Flavonoids	Flavonols	1.43518	0.0270597	0.137251	0.253761	-1.97846	down	C21833	ko00944,ko01110
Lmbp002592	Kaempferol-3,7-O-diglucoside	Flavonoids	Flavonols	1.40512	0.0242582	0.130605	0.403014	-1.3111	down	--	--
HJAP120	Rhamnetin-3-O-Rutinoside*	Flavonoids	Flavonols	1.22768	0.0396474	0.153005	0.499756	-1.0007	down	--	--
Lmsp004721	Tamarixetin-3-O-glucoside-7-O-rhamnoside	Flavonoids	Flavonols	1.35641	0.0233189	0.130374	0.430043	-1.21745	down	--	--
MWSHY0135	Isorhamnetin-3-O-rutinoside (Narcissin)*	Flavonoids	Flavonols	1.32975	0.019106	0.124402	0.361719	-1.46706	down	--	--
Lmmp002463	Sexangularetin-3-O-glucoside-7-O-rhamnoside	Flavonoids	Flavonols	1.2649	0.0224901	0.128664	0.379883	-1.39637	down	--	--
Lmmp002963	6-C-Methylquercetin-3-O-rutinoside	Flavonoids	Flavonols	1.22251	0.0318491	0.143846	0.470053	-1.0891	down	--	--
MWSHY0064	Isorhamnetin-3-O-neohesperidoside*	Flavonoids	Flavonols	1.39453	0.00319124	0.0603881	0.372152	-1.42604	down	--	--
Hmcp001629	Kaempferol-3-O-(6''-Malonyl)glucoside-7-O-Glucoside	Flavonoids	Flavonols	1.28359	0.0246476	0.130605	0.433324	-1.20648	down	--	--
Hmcp001618	Quercetin-3-O-(2''-O-Xylosyl)rutinoside	Flavonoids	Flavonols	1.28364	0.00934405	0.0884091	0.577202	-0.792851	down	C10175	ko00944
pmp001105	Kaempferol-3-O-neohesperidoside-7-O-glucoside	Flavonoids	Flavonols	1.39114	0.00846788	0.0841492	0.416756	-1.26272	down	--	--
Hmcp001329	Quercetin-3-O-xylosyl(1→2)glucosyl(1→2)glucoside	Flavonoids	Flavonols	1.26289	0.0441629	0.163369	0.716318	-0.481328	down	--	--
MWSHY0137	Naringenin (5,7,4'-Trihydroxyflavanone)	Flavonoids	Flavanones	1.57598	0.00176486	0.0542695	0.467575	-1.09673	down	C00509	ko00941,ko00943,ko01100,ko01110
pme3475	Butin; 7,3',4'-Trihydroxyflavanone	Flavonoids	Flavanones	1.4734	0.0309291	0.143558	0.564239	-0.825623	down	C09614	ko00941
mws0064	Eriodictyol (5,7,3',4'-Tetrahydroxyflavanone)	Flavonoids	Flavanones	1.60232	0.00516258	0.0684621	0.378593	-1.40128	down	C05631	ko00941,ko01100,ko01110
mws1564	Farrerol (6,8-Dimethyl-5,7,4'-trihydroxyflavanone)	Flavonoids	Flavanones	1.54582	0.00129246	0.0542695	0.605935	-0.722766	down	C09734	--
mws0463	Hesperetin	Flavonoids	Flavanones	1.48192	0.00400608	0.0648887	0.51584	-0.955005	down	C01709	ko00941
HJN087	Naringenin-4'-O-glucoside	Flavonoids	Flavanones	1.25619	0.038688	0.152276	0.390677	-1.35595	down	--	--
Zmhn001036	Choerospondin	Flavonoids	Flavanones	1.27755	0.0296909	0.142053	0.278707	-1.84318	down	--	--
HJN090	Butin-7-O-glucoside	Flavonoids	Flavanones	1.29323	0.0321721	0.143846	0.398526	-1.32726	down	--	--
MWS20145	Eriodictyol-7-O-glucoside	Flavonoids	Flavanones	1.64093	0.0335831	0.143846	12372.2	13.5948	up	--	--
pmb3023	Eriodictyol-8-C-glucoside	Flavonoids	Flavanones	1.20377	0.0306959	0.143558	0.374692	-1.41622	down	--	--
HJN086	Eriodictyol-3'-O-glucoside	Flavonoids	Flavanones	1.48768	0.0378852	0.150319	0.403723	-1.30856	down	--	--
Jmgn004021	6-C-Glucosyl-2-Hydroxynaringenin	Flavonoids	Flavanones	1.24827	0.0321602	0.143846	0.312796	-1.67671	down	--	--
Lmzp002365	Hesperetin-7-O-glucoside	Flavonoids	Flavanones	1.48298	0.00268409	0.0574161	0.609553	-0.714177	down	C16422	ko00941
pmb0686	Eriodictyol-7-O-(6''-malonyl)glucoside	Flavonoids	Flavanones	1.23445	0.0487936	0.171215	0.440926	-1.18139	down	--	--
mws0914	Pinobanksin	Flavonoids	Flavanonols	1.60568	0.00289322	0.0593111	0.353232	-1.50131	down	C09826	ko00941
mws0744	Dihydromyricetin (Ampelopsin)	Flavonoids	Flavanonols	1.64356	0.00903704	0.0871808	2042.67	10.9962	up	C02906	ko00941,ko01110
Lmtn002796	Aromadendrin-7-O-glucoside	Flavonoids	Flavanonols	1.18999	0.0325799	0.143846	0.359456	-1.47611	down	--	--
pme2960	Naringenin chalcone; 2',4,4',6'-Tetrahydroxychalcone	Flavonoids	Chalcones	1.57782	0.000605172	0.0330827	0.471347	-1.08514	down	C06561	ko00941,ko01100,ko01110
pme1201	Phloretin	Flavonoids	Chalcones	1.54752	0.0164823	0.117526	0.381657	-1.38965	down	C00774	ko00941,ko01110
Lmlp006175	Isosalipurposide (Phlorizin Chalcone)	Flavonoids	Chalcones	1.19306	0.0297388	0.142053	0.462398	-1.11279	down	C16406	ko00941
HJN055	Dihydrocharcone-4'-O-glucoside	Flavonoids	Chalcones	1.45809	0.0138381	0.104744	0.282699	-1.82266	down	--	--
mws2118	Phloretin-2'-O-glucoside (Phlorizin)	Flavonoids	Chalcones	1.37108	0.00802391	0.0841492	0.352069	-1.50607	down	C01604	ko00941,ko01110
Hmpn005101	Sieboldin	Flavonoids	Chalcones	1.4634	0.0331032	0.143846	0.435305	-1.1999	down	--	--
Lmnp002584	Hispidulin-8-C-(2''-O-glucosyl)glucoside	Flavonoids	Flavonoid carbonoside	1.4429	0.00592588	0.0747572	1.5409	0.623772	up	--	--
HJAP026	Chrysoeriol-6-C-glucoside-4'-O-glucoside	Flavonoids	Flavonoid carbonoside	1.33059	0.028467	0.140841	1.5435	0.626209	up	--	--
MWSslk012	Neomangiferin	Flavonoids	Other Flavonoids	1.45901	0.00171082	0.0542695	0.512166	-0.965316	down	--	--
Lmbn001930	2-Hydroxybenzaldehyde (Salicylaldehyde)	Phenolic acids	Phenolic acids	1.64139	0.017323	0.120041	2405.6	11.2322	up	C06202	ko01100
mws1078	Anthranilic Acid	Phenolic acids	Phenolic acids	1.32297	0.00783466	0.0841492	7.80491	2.96438	up	C00108	ko00380,ko00400,ko00998,ko01058,ko01100,ko01110,ko01230
pmb0142	Caffeic aldehyde	Phenolic acids	Phenolic acids	1.4047	0.0108758	0.0942405	0.68569	-0.544372	down	C10945	ko00940,ko01110
NK10253223	2-Amino-3-methoxybenzoic acid	Phenolic acids	Phenolic acids	1.64608	0.000131542	0.0129437	8.18703e-05	-13.5763	down	C05831	ko00380
Hmbp001276	Gallacetophenone	Phenolic acids	Phenolic acids	1.42777	0.00474024	0.0666342	0.677924	-0.560805	down	--	--
Lmmp003042	Protocatechuic Acid Methyl Ester	Phenolic acids	Phenolic acids	1.37195	0.0145553	0.108503	0.776975	-0.36406	down	--	--
MWSmce455	Vanillic acid methyl ester	Phenolic acids	Phenolic acids	1.43217	0.0210453	0.126272	0.659536	-0.600478	down	--	--
MWSmce675	Arbutin	Phenolic acids	Phenolic acids	1.24579	0.0308967	0.143558	0.650886	-0.619523	down	C06186	ko00010
Zmhn001358	4-O-Glucosyl-4-hydroxybenzoic acid*	Phenolic acids	Phenolic acids	1.31112	0.0162298	0.117428	0.73594	-0.44234	down	--	--
pmb3142	Salicylic acid-2-O-glucoside	Phenolic acids	Phenolic acids	1.53332	0.0281685	0.140841	0.428876	-1.22137	down	--	--
Lmsn002247	1-O-Salicyloyl-β-D-glucose*	Phenolic acids	Phenolic acids	1.49927	0.0249549	0.130615	0.551987	-0.857294	down	--	--
Hmsn002598	Salirepin	Phenolic acids	Phenolic acids	1.41157	0.0113671	0.0942405	1.72471	0.786357	up	--	--
Lmhn003074	Feruloylmalic acid	Phenolic acids	Phenolic acids	1.37357	0.0153467	0.112695	0.75949	-0.396898	down	--	--
pmb2871	1-O-Gentisoyl-β-D-glucoside	Phenolic acids	Phenolic acids	1.53855	0.00855175	0.0841492	0.549232	-0.864512	down	--	--
Lmfp001509	1-O-Galloyl-rhamnose	Phenolic acids	Phenolic acids	1.62786	8.75245e-05	0.0129437	1.2795	0.355578	up	--	--
pmn001419	1-O-p-Coumaroyl-β-D-glucose	Phenolic acids	Phenolic acids	1.25347	0.0343684	0.144255	0.776622	-0.364715	down	C16827	--
Hmhn003067	Phenylpropionic acid-O-β-D-glucopyranoside	Phenolic acids	Phenolic acids	1.50703	0.00253085	0.0574161	0.905387	-0.143393	down	--	--
Lmmn003663	5-Glucosyloxy-2-Hydroxybenzoic acid methyl ester	Phenolic acids	Phenolic acids	1.51211	0.0168721	0.118587	0.695978	-0.522886	down	--	--
Zmhn001883	Vanillic acid-4-O-glucoside	Phenolic acids	Phenolic acids	1.23913	0.0368396	0.148566	0.780062	-0.358339	down	--	--
pmn001420	1-O-Caffeoyl-β-D-glucose*	Phenolic acids	Phenolic acids	1.20519	0.0402932	0.153676	0.864417	-0.210201	down	C10433	--
Zmhn001793	6-O-Caffeoyl-D-glucose*	Phenolic acids	Phenolic acids	1.1981	0.0475396	0.169881	0.797643	-0.326184	down	--	--
mws0906	Coniferin	Phenolic acids	Phenolic acids	1.47769	0.0116158	0.0942405	0.833429	-0.262868	down	C00761	ko00940
mws2108	Cryptochlorogenic acid (4-O-Caffeoylquinic acid)	Phenolic acids	Phenolic acids	1.31411	0.0458541	0.167373	0.249666	-2.00193	down	--	--
mws0179	Chlorogenic acid methyl ester	Phenolic acids	Phenolic acids	1.49025	0.00998198	0.0892934	0.287538	-1.79817	down	--	--
pmn001695	Trihydroxycinnamoylquinic acid	Phenolic acids	Phenolic acids	1.64494	0.00198882	0.0574161	15186.7	13.8905	up	--	--
Lmzn001983	D-Threo-guaiacylglycerol-7-O-β-D-glucoside	Phenolic acids	Phenolic acids	1.23879	0.0269961	0.137251	0.641238	-0.641068	down	--	--
Cmzn005251	6-O-Caffeoylarbutin	Phenolic acids	Phenolic acids	1.25939	0.0209574	0.126272	0.29217	-1.77512	down	--	--
pmb3072	3-O-p-Coumaroylshikimic acid-O-glucoside	Phenolic acids	Phenolic acids	1.30641	0.0349174	0.144364	0.21698	-2.20437	down	--	--
pmb3066	5-O-p-Coumaroylshikimic acid O-glucoside	Phenolic acids	Phenolic acids	1.1112	0.0476497	0.169881	1.61343	0.690131	up	--	--
pmb3064	3-O-p-Coumaroylquinic acid-O-glucoside	Phenolic acids	Phenolic acids	1.40944	0.000122955	0.0129437	0.0605753	-4.04513	down	--	--
pmb3061	5-O-p-Coumaroylquinic acid O-glucoside	Phenolic acids	Phenolic acids	1.26556	0.0291868	0.142053	0.721182	-0.471564	down	--	--
Lmsn002288	1-O-Caffeoyl-(6-O-glucosyl)-β-D-glucose	Phenolic acids	Phenolic acids	1.4256	0.0186558	0.124036	0.671162	-0.575267	down	--	--
pmb0824	Syringic acid-4-O-(6''-feruloyl)glucoside	Phenolic acids	Phenolic acids	1.45633	0.00432709	0.066529	1.72396	0.785729	up	--	--
pmn001743	Specnuezhenide	Phenolic acids	Phenolic acids	1.49375	0.00160821	0.0542695	1.56146	0.642895	up	--	--
Hmln002355	5'-Methoxymatairesinoside	Lignans and Coumarins	Lignans	1.23425	0.0208179	0.118952	1.14586	0.196426	up	--	--
Lmmn002260	5'-Methoxyisolariciresinol-9'-O-glucoside	Lignans and Coumarins	Lignans	1.33621	0.00836191	0.0905852	0.543103	-0.880702	down	--	--
Rfmb26201	Syringaresinol-4'-O-(6''-acetyl)glucoside	Lignans and Coumarins	Lignans	1.19728	0.00962192	0.091729	2.28912	1.19479	up	--	--
Cmqn003939	liriodendrin;Syringaresinol-di-O-glucoside	Lignans and Coumarins	Lignans	1.39647	0.00637635	0.0868398	1.50696	0.591644	up	--	--
Lmdn004267	Epipinoresinol*	Lignans and Coumarins	Lignans	1.27888	0.0236814	0.118952	4.90214	2.29341	up	--	--
MWSmce265	Decursinol	Lignans and Coumarins	Coumarins	1.58258	0.00159965	0.0560834	2595.69	11.3419	up	C09259	--
Lmbn001162	Esculetin-7-O-glucoside	Lignans and Coumarins	Coumarins	1.40654	0.00408851	0.0727969	1.58173	0.661499	up	--	--
mws1015	Esculin (6,7-DihydroxyCoumarin-6-glucoside)	Lignans and Coumarins	Coumarins	1.26221	0.0192165	0.118952	1.47056	0.556365	up	C09264	--
Cmyn001328	Daphnin	Lignans and Coumarins	Coumarins	1.21858	0.0228953	0.118952	1.43458	0.520631	up	C01421	--

## Sheet: Table S5C
Table S5C. Significantly differential metabolites between N250 and N400
Index	Compounds	Class I	Class II	VIP	p_value	FDR	Fold_Change	Log2FC	Type	cpd_ID	kegg_map
MWSHY0069	Hispidulin (5,7,4'-Trihydroxy-6-methoxyflavone)	Flavonoids	Flavones	1.7525	0.0341636	0.581507	0.489413	-1.03088	down	C10058	--
Zmhp003514	6,7,8-Tetrahydroxy-5-methoxyflavone	Flavonoids	Flavones	1.7686	0.0314591	0.581507	0.490744	-1.02696	down	--	--
MWSHY0009	Diosmetin (5,7,3'-Trihydroxy-4'-methoxyflavone)	Flavonoids	Flavones	1.68912	0.0468343	0.581507	0.508204	-0.97652	down	C10038	--
pmp000004	4',5,7-Trihydroxy-3',6-dimethoxyflavone (Jaceosidin)	Flavonoids	Flavones	1.76786	0.0359103	0.581507	0.481566	-1.05419	down	--	--
Lmdp002969	Myricetin-3-O-galactoside	Flavonoids	Flavonols	1.79588	0.0310902	0.581507	0.191842	-2.38201	down	--	--
pme1662	5,4'-Dihydroxy-7-methoxyflavanone (Sakuranetin)	Flavonoids	Flavanones	2.29339	0.00393522	0.388012	0.00264965	-8.55998	down	C09833	ko00941,ko01110
mws1454	Persicoside	Flavonoids	Flavanones	1.75927	0.0177574	0.547151	0.197021	-2.34358	down	--	--
mws0744	Dihydromyricetin (Ampelopsin)	Flavonoids	Flavanonols	2.28678	0.00903704	0.54564	2042.67	10.9962	up	C02906	ko00941,ko01110
Lmsn003297	3,4,2',4',6'-Pentahydroxychalcone-4'-O-glucoside	Flavonoids	Chalcones	2.28927	0.0269851	0.581507	8.3485e-05	-13.5481	down	C16408	ko00941
Lmtp002942	Apigenin-6,8-di-C-arabinoside*	Flavonoids	Flavonoid carbonoside	1.75933	0.0208225	0.581507	1.46302	0.548953	up	--	--
mws1292	Isoschaftoside	Flavonoids	Flavonoid carbonoside	1.86006	0.0377914	0.581507	1.53259	0.615975	up	--	--
Lmtp002474	Apigenin-6-C-(2''-glucosyl)arabinoside	Flavonoids	Flavonoid carbonoside	1.6992	0.0323023	0.581507	1.31694	0.397194	up	--	--
Lmnp102580	Apigenin-6-C-(2''-xylosyl)glucoside	Flavonoids	Flavonoid carbonoside	2.29332	0.00023404	0.115381	71839.2	16.1325	up	--	--
Lmbn001930	2-Hydroxybenzaldehyde (Salicylaldehyde)	Phenolic acids	Phenolic acids	2.28541	0.017323	0.547151	2405.6	11.2322	up	C06202	ko01100
mws1078	Anthranilic Acid	Phenolic acids	Phenolic acids	2.29125	0.0101765	0.54564	4530.75	12.1455	up	C00108	ko00380,ko00400,ko00998,ko01058,ko01100,ko01110,ko01230
pme2828	4-Nitrophenol	Phenolic acids	Phenolic acids	1.68685	0.0460142	0.581507	0.855671	-0.224872	down	C00870	--
Zmgn004894	Methyl 4-hydroxybenzoate	Phenolic acids	Phenolic acids	1.79232	0.0367905	0.581507	0.231418	-2.11143	down	--	--
NK10253223	2-Amino-3-methoxybenzoic acid	Phenolic acids	Phenolic acids	2.29561	0.00111245	0.27002	0.000208847	-12.2253	down	C05831	ko00380
pmb2497	4-Hydroxy-3-methoxymandelate	Phenolic acids	Phenolic acids	2.01866	0.0143881	0.54564	0.851314	-0.232237	down	C05584	ko00350,ko01100
Lmhn003074	Feruloylmalic acid	Phenolic acids	Phenolic acids	1.89654	0.0397021	0.581507	0.672168	-0.573106	down	--	--
Lmmn003663	5-Glucosyloxy-2-Hydroxybenzoic acid methyl ester	Phenolic acids	Phenolic acids	1.8783	0.0133551	0.54564	0.871631	-0.198211	down	--	--
Zmhn001883	Vanillic acid-4-O-glucoside	Phenolic acids	Phenolic acids	1.91549	0.0120781	0.54564	0.758232	-0.399289	down	--	--
pmn001695	Trihydroxycinnamoylquinic acid	Phenolic acids	Phenolic acids	2.29401	0.00198882	0.27002	15186.7	13.8905	up	--	--
Lmtn002324	Benzyl-(2''-O-glucosyl)glucoside*	Phenolic acids	Phenolic acids	1.02893	0.0462435	0.581507	0.465775	-1.1023	down	C17564	--
pmb3066	5-O-p-Coumaroylshikimic acid O-glucoside	Phenolic acids	Phenolic acids	1.94128	0.0121449	0.54564	1.18616	0.246304	up	--	--
Rfmb26201	Syringaresinol-4'-O-(6''-acetyl)glucoside	Lignans and Coumarins	Lignans	1.64034	0.0439031	0.461883	1.39797	0.483333	up	--	--
Lmdn004267	Epipinoresinol*	Lignans and Coumarins	Lignans	2.0147	0.0218581	0.390714	0.601661	-0.732976	down	--	--
Lmbn001162	Esculetin-7-O-glucoside	Lignans and Coumarins	Coumarins	1.94213	0.0134878	0.362759	1.24587	0.317148	up	--	--
Cmyn001328	Daphnin	Lignans and Coumarins	Coumarins	1.88588	0.0159466	0.362759	1.18691	0.247211	up	C01421	--

## Sheet: Table S6
Table S6. Dynamics of differential metabolites in pepper fruits under different nitrogen fertilizer supply
Index	Sub Class	Formula	Compounds	Class I	Class II	CAS	Level	N0-1	N0-2	N0-3	N0-4	N250-1	N250-2	N250-3	N250-4	N400-1	N400-2	N400-3	N400-4	mix01	mix02	mix03
mws0072	1	C21H20O10	Apigenin-5-O-glucoside	Flavonoids	Flavones	28757-27-9	3	584450	840170	627360	1058800	285240	407390	310820	478650	327310	393760	503060	618130	260930	269230	299700
MWSHY0080	1	C27H30O15	Luteolin-7-O-neohesperidoside (Lonicerin)	Flavonoids	Flavones	25694-72-8	3	14275000	22375000	8930100	24112000	5346300	4257300	2535000	7902400	1958800	5652000	5679400	5836300	2518500	3211100	2987200
Hmpp002612	1	C27H30O16	Luteolin-7-O-gentiobioside	Flavonoids	Flavones	-	3	2979600	3134500	1857200	4164600	1449000	1231000	960240	1576000	618980	1396300	1463200	1172300	570410	636540	642730
Hmqp003435	1	C29H30O17	Apigenin-7-O-(2''-O-apiosyl)(6''-Malonyl)glucoside	Flavonoids	Flavones	-	1	24717000	24375000	24677000	27597000	18440000	18346000	21492000	19274000	16723000	24930000	23447000	19966000	11665000	9755700	10419000
Hmqp003184	1	C29H30O18	Luteolin-7-O-(6''-malonyl)glucoside-5-O-arabinoside	Flavonoids	Flavones	-	3	1215900	1277900	1558900	1498300	1076900	1001600	722570	1193100	986730	1102300	903030	1220200	490790	422520	490330
mws2627	1	C16H12O7	Tamarixetin (3,3',5,7-Tetrahydroxy-4'-Methoxyflavone)	Flavonoids	Flavonols	603-61-2	1	32513	33265	35441	44368	29787	28499	24163	32284	27496	26491	30751	26030	12649	15273	17340
pmp001309	1	C21H20O12	6-Hydroxykaempferol-7-O-glucoside	Flavonoids	Flavonols	-	3	310380	391390	280150	413010	197550	206920	167270	341370	158140	255500	254880	277370	175670	162030	81574
mws0856	1	C21H20O12	Quercetin-4'-O-glucoside (Spiraeoside)	Flavonoids	Flavonols	20229-56-5	2	591180	896990	492120	873800	298940	341280	92477	584610	209230	448400	449730	598840	230040	272500	251760
Lmjp003295	1	C22H22O12	6-Methoxykaempferol-3-O-glucoside	Flavonoids	Flavonols	63422-27-5	3	426580	411380	365850	597960	203040	277230	259620	349420	198280	288470	362440	337290	188330	160610	180580
Lmjp002906	1	C22H22O12	Rhamnetin-3-O-Glucoside*	Flavonoids	Flavonols	27875-34-9	3	380130	397020	379280	519750	275550	348210	138160	243650	166070	282900	261060	346540	156870	167040	236850
pmb0565	1	C23H24O13	Syringetin-3-O-glucoside	Flavonoids	Flavonols	40039-49-4	3	811160	1017900	822300	914550	679150	609970	528450	596850	551120	540380	671310	894880	341930	341970	392300
MWSslk254	1	C27H30O15	Kaempferol-3-O-glucorhamnoside*	Flavonoids	Flavonols	40437-72-7	1	12573000	20594000	8514600	25863000	5137300	3876200	2848000	7550300	1996200	4910200	6377000	5706000	2632000	3154400	3472300
Lmjp002867	1	C27H30O15	Kaempferol-3-O-neohesperidoside*	Flavonoids	Flavonols	32602-81-6	1	14107000	21514000	9496800	25737000	4027800	3683400	2629400	7236100	2045600	5047500	6437800	6072300	3017300	3456000	3635800
MWSHY0050	1	C27H30O15	Kaempferol-3-O-rutinoside(Nicotiflorin)*	Flavonoids	Flavonols	17650-84-9	1	14694000	20379000	9486600	24950000	4749800	4108700	2541500	7635200	2011900	4854600	4641400	6130900	3047400	3274000	3139700
Lmbp002592	1	C27H30O16	Kaempferol-3,7-O-diglucoside	Flavonoids	Flavonols	25615-14-9	3	2693000	2867200	1764700	3874200	1343200	1138300	949190	1554600	656090	1338500	1250600	1268200	566230	640180	630050
HJAP120	1	C28H32O16	Rhamnetin-3-O-Rutinoside*	Flavonoids	Flavonols	-	3	141540	138210	65327	141380	50419	35650	39402	86429	35104	89393	59191	59422	35398	32011	27921
Lmsp004721	1	C28H32O16	Tamarixetin-3-O-glucoside-7-O-rhamnoside	Flavonoids	Flavonols	-	3	132460	133370	78304	171100	41417	40553	39010	90030	30613	67520	61655	61785	36924	39241	29275
MWSHY0135	1	C28H32O16	Isorhamnetin-3-O-rutinoside (Narcissin)*	Flavonoids	Flavonols	604-80-8	3	129920	167910	76492	163900	67266	42048	34925	104530	19804	58983	62778	53120	34214	35592	40000
Lmmp002463	1	C28H32O16	Sexangularetin-3-O-glucoside-7-O-rhamnoside	Flavonoids	Flavonols	-	3	110690	158770	71678	148050	54967	43280	44774	87330	16204	63513	53810	52307	48631	34481	45030
Lmmp002963	1	C28H32O16	6-C-Methylquercetin-3-O-rutinoside	Flavonoids	Flavonols	-	3	117020	143350	65704	139180	47875	39017	42533	77129	25212	63513	67910	62059	36024	35669	38727
MWSHY0064	1	C28H32O16	Isorhamnetin-3-O-neohesperidoside*	Flavonoids	Flavonols	55033-90-4	3	137190	177030	110440	166330	36015	40553	44329	115450	24312	65327	63675	66624	34223	46995	34224
Hmcp001629	1	C30H32O19	Kaempferol-3-O-(6''-Malonyl)glucoside-7-O-Glucoside	Flavonoids	Flavonols	-	1	2310900	2449300	1384500	3083900	823700	847000	538990	1504700	455170	1327800	1204500	1011500	414360	455950	464380
Hmcp001618	1	C32H38O20	Quercetin-3-O-(2''-O-Xylosyl)rutinoside	Flavonoids	Flavonols	129235-39-8	2	5172700	4228400	3847100	4309600	3252900	2382900	2134100	2550800	1474600	3085800	2468400	3105600	1144300	1203400	1238100
pmp001105	1	C33H40O20	Kaempferol-3-O-neohesperidoside-7-O-glucoside	Flavonoids	Flavonols	-	3	670750	785890	464650	826790	351300	348620	253860	434880	157410	262370	395710	329790	163490	182700	168200
Hmcp001329	1	C32H38O21	Quercetin-3-O-xylosyl(1→2)glucosyl(1→2)glucoside	Flavonoids	Flavonols	-	3	130620	146490	120040	125340	95373	86903	74726	89677	80979	127890	74992	90408	42524	35996	38449
mws0064	1	C15H12O6	Eriodictyol (5,7,3',4'-Tetrahydroxyflavanone)	Flavonoids	Flavanones	552-58-9	3	72317	108700	80531	83487	45638	32906	29971	58246	29591	36532	30103	34402	24982	24423	25486
mws1564	1	C17H16O5	Farrerol (6,8-Dimethyl-5,7,4'-trihydroxyflavanone)	Flavonoids	Flavanones	24211-30-1	3	175320	178790	171490	212770	110620	114210	97987	122260	116660	94414	117780	118550	39051	42619	40417
HJN087	1	C21H22O10	Naringenin-4'-O-glucoside	Flavonoids	Flavanones	-	1	9128000	13526000	7672500	17544000	3781400	4466600	4109500	8922800	1894100	4890000	4811800	7106000	3347800	2931400	2937500
Zmhn001036	1	C21H22O10	Choerospondin	Flavonoids	Flavanones	81202-36-0	1	30438000	52253000	21255000	52272000	5689700	9363400	4827300	22551000	2828800	8847300	14958000	16905000	7233400	7139300	7045100
HJN090	1	C21H22O10	Butin-7-O-glucoside	Flavonoids	Flavanones	-	1	10551000	14172000	8070900	18253000	3283000	4603100	3537900	10093000	2313500	4697100	6322600	7010300	3485700	2866100	3007700
pmb3023	1	C21H22O11	Eriodictyol-8-C-glucoside	Flavonoids	Flavanones	1023271-51-3	3	371840	518730	337320	720260	92382	161540	94716	196740	52216	213690	189150	274900	99209	98536	89937
HJN086	1	C21H22O11	Eriodictyol-3'-O-glucoside	Flavonoids	Flavanones	-	2	90721	96480	66416	147740	38103	37436	39868	67652	37452	34847	44734	45004	82609	35933	79301
Jmgn004021	1	C21H22O11	6-C-Glucosyl-2-Hydroxynaringenin	Flavonoids	Flavanones	-	2	2536600	3505900	1814900	4647300	548850	764430	407980	1161000	246620	1247300	1130700	1286800	499350	466680	459030
Lmzp002365	1	C22H24O11	Hesperetin-7-O-glucoside	Flavonoids	Flavanones	31712-49-9	2	1112300	1007900	1209600	1341200	718810	840680	632070	728040	686330	612940	864950	683000	348240	398100	362900
pme1598	1	C22H24O11	Hesperetin-5-O-glucoside	Flavonoids	Flavanones	69651-80-5	2	637530	852370	553780	918390	292940	327030	328250	558950	46318	480810	465940	595630	251920	294880	288360
pmb0686	1	C24H24O14	Eriodictyol-7-O-(6''-malonyl)glucoside	Flavonoids	Flavanones	-	3	341420	386790	192670	514520	178410	120800	87304	210850	74635	184500	217660	156110	73103	112280	91189
Lmtn002796	1	C21H22O11	Aromadendrin-7-O-glucoside	Flavonoids	Flavanonols	28189-90-4	2	1366100	1797300	948820	2355200	274520	499300	307810	583760	145680	731730	670650	776690	366070	281250	350230
pme1201	1	C15H14O5	Phloretin	Flavonoids	Chalcones	60-82-2	3	159780	165780	192120	271380	70692	67738	72663	109080	65124	76402	75265	84359	54787	57511	52196
Lmlp006175	1	C21H22O10	Isosalipurposide (Phlorizin Chalcone)	Flavonoids	Chalcones	4547-85-7	2	12478000	18671000	10147000	19448000	5078700	6603600	6456600	14053000	2830000	6903400	8393100	9961400	3172000	4231400	3656100
HJN055	1	C21H24O10	Dihydrocharcone-4'-O-glucoside	Flavonoids	Chalcones	-	1	473920	668050	412640	811890	118900	172950	124710	213620	81007	156410	224720	206870	115040	103810	164500
mws2118	1	C21H24O10	Phloretin-2'-O-glucoside (Phlorizin)	Flavonoids	Chalcones	60-81-1	1	710110	951230	697670	1181400	248330	236030	213550	425390	136690	258810	484620	366350	244600	158290	158470
Hmpn005101	1	C21H24O11	Sieboldin	Flavonoids	Chalcones	18777-73-6	3	55584	47284	37713	77889	16224	26569	10085	25022	23391	18699	29064	23947	24259	19820	25912
MWSslk012	1	C25H28O16	Neomangiferin	Flavonoids	Other Flavonoids	64809-67-2	3	60793	53823	51898	68933	46622	29267	28416	36403	23236	33852	24806	38694	17535	16809	18929
pmp001285	1	C8H4O3	Phthalic anhydride	Phenolic acids	Phenolic acids	85-44-9	1	258700	245560	223770	221980	204220	170980	187270	205700	231860	229540	196730	180320	166070	167440	153250
pmb0142	1	C9H8O3	Caffeic aldehyde	Phenolic acids	Phenolic acids	141632-15-7	3	25874	30676	23761	22861	18078	22091	16744	15676	17506	18282	14655	20301	20760	23092	19046
MWSmce675	1	C12H16O7	Arbutin	Phenolic acids	Phenolic acids	497-76-7	3	117380	135310	122870	176830	80065	99608	69763	93796	60954	98517	106790	93282	49898	51267	53741
MWSmce341	1	C16H22O4	Butyl isobutyl phthalate*	Phenolic acids	Phenolic acids	17851-53-5	1	13018000	11141000	11853000	11377000	11160000	10647000	9259800	10392000	11941000	9959500	10302000	10900000	8591600	9316300	8574500
Lmlp012720	1	C16H22O4	Dibutyl phthalate*	Phenolic acids	Phenolic acids	84-74-2	1	12113000	11587000	12224000	11475000	11430000	10422000	10115000	10665000	12445000	11602000	10774000	10165000	8813000	8280000	8925500
pmb3142	1	C13H16O8	Salicylic acid-2-O-glucoside	Phenolic acids	Phenolic acids	10366-91-3	3	1438700	1554700	1201600	2291100	702320	844610	627860	1002000	632240	696130	769080	684280	442780	402380	487370
Lmsn002247	1	C13H16O8	1-O-Salicyloyl-β-D-glucose*	Phenolic acids	Phenolic acids	60517-74-0	1	15022000	18018000	13699000	22259000	8202300	9413000	7626300	10756000	9086400	9070600	9468000	10461000	6298100	6102900	6401700
Lmmn002179	1	C14H18O8	Methyl salicylate-2-O-glucoside	Phenolic acids	Phenolic acids	10019-60-0	2	698060	766700	693310	758710	476490	638260	472660	458690	514660	555300	658030	711850	536240	492920	503760
pmb2871	1	C13H16O9	1-O-Gentisoyl-β-D-glucoside	Phenolic acids	Phenolic acids	23445-11-6	2	145460	165350	147740	204840	82462	75912	81726	112150	84639	82116	100260	97340	59036	58915	79993
Hmhn003067	1	C15H18O8	Phenylpropionic acid-O-β-D-glucopyranoside	Phenolic acids	Phenolic acids	-	1	84030000	86529000	87026000	90137000	78837000	77031000	73137000	83646000	76384000	79787000	79438000	79214000	55125000	54641000	55088000
pmn001420	1	C15H18O9	1-O-Caffeoyl-β-D-glucose*	Phenolic acids	Phenolic acids	14364-08-0	1	50787000	54616000	45946000	51493000	46351000	48422000	39548000	44133000	41428000	39745000	47806000	46361000	20999000	20408000	21412000
Zmhn001793	1	C15H18O9	6-O-Caffeoyl-D-glucose*	Phenolic acids	Phenolic acids	-	1	30007000	34809000	37618000	41327000	30619000	34701000	23895000	29204000	24761000	30101000	29738000	30070000	14089000	14577000	13469000
mws2108	1	C16H18O9	Cryptochlorogenic acid (4-O-Caffeoylquinic acid)	Phenolic acids	Phenolic acids	905-99-7	3	6934300	4578100	3114200	9819400	1128700	1331700	1167200	4044100	418740	1579300	2840300	1265000	4363800	4364800	4672600
mws0179	1	C17H20O9	Chlorogenic acid methyl ester	Phenolic acids	Phenolic acids	29708-87-0	2	155870	173260	149840	261940	60627	73030	47757	94316	29400	46729	75269	61642	120620	87554	95373
Lmzn001983	1	C16H24O10	D-Threo-guaiacylglycerol-7-O-β-D-glucoside	Phenolic acids	Phenolic acids	-	2	67503	78951	66449	77125	42651	43490	43490	61314	30545	49016	41944	64472	64332	72314	76655
Cmzn005251	1	C21H22O10	6-O-Caffeoylarbutin	Phenolic acids	Phenolic acids	136172-60-6	1	22223000	37867000	17234000	36049000	4385200	6857000	3661700	15982000	1936800	7120400	11224000	12843000	5206800	4341500	4852300
pmb3064	1	C22H28O13	3-O-p-Coumaroylquinic acid-O-glucoside	Phenolic acids	Phenolic acids	-	2	22356	18013	20970	15524	9	9	4471.4	9	9	4629	9	9	14567	19633	16886
Zmxp002867	2	C28H32O16	Chrysoeriol-5,7-di-O-glucoside	Flavonoids	Flavones	-	3	99754	127920	118100	145260	59151	75929	60271	109080	47545	55838	30366	92649	164190	155300	117270
mws0038	2	C17H14O6	Kumatakenin	Flavonoids	Flavonols	3301-49-3	2	7449.5	7681.1	9642.6	6247.1	3874.4	6566.4	7440.7	8378.7	3906.9	5777	3308.7	4961.5	21947	21791	22275
MWSHY0137	2	C15H12O5	Naringenin (5,7,4'-Trihydroxyflavanone)	Flavonoids	Flavanones	480-41-1	1	25192000	30298000	23488000	31954000	13502000	13496000	13532000	24937000	12113000	12016000	16279000	11461000	7948000	7732100	6620000
pme3475	2	C15H12O5	Butin; 7,3',4'-Trihydroxyflavanone	Flavonoids	Flavanones	492-14-8	3	11372000	18841000	12347000	13411000	8896300	8431800	9699100	17164000	8599200	6990100	8790600	7201100	5341100	3743600	5520200
mws0463	2	C16H14O6	Hesperetin	Flavonoids	Flavanones	520-33-2	3	18921	23061	28122	25762	17215	18031	23185	37472	12656	15468	12253	9074.5	15324	11199	9219.3
mws0914	2	C15H12O5	Pinobanksin	Flavonoids	Flavanonols	548-82-3	1	19728000	26156000	25589000	29339000	9857200	9273300	12565000	18072000	9564200	7747400	9707300	8591100	6674200	7630200	7465100
pme2960	2	C15H12O5	Naringenin chalcone; 2',4,4',6'-Tetrahydroxychalcone	Flavonoids	Chalcones	73692-50-9	1	67862000	73757000	67445000	85543000	41370000	38159000	47273000	63321000	38096000	27584000	37150000	36032000	17255000	16482000	16904000
Zmjp003031	2	C27H30O16	Orientin-2''-O-galactoside	Flavonoids	Flavonoid carbonoside	-	2	1626700	1906100	1227100	2383500	1083100	908360	803600	1188400	9	1121300	1010200	806900	460570	513820	480260
NK10253223	2	C8H9NO3	2-Amino-3-methoxybenzoic acid	Phenolic acids	Phenolic acids	3177-80-8	3	100710	121310	107220	110480	36798	41722	40910	52945	9	9	9	9	23400	32714	25952
Hmbp001276	2	C8H8O4	Gallacetophenone	Phenolic acids	Phenolic acids	528-21-2	1	8375600	9667400	8262800	9313700	5682500	7718500	7540300	8331200	4763200	7199000	5857700	6327400	11937000	15652000	14032000
Lmmp003042	2	C8H8O4	Protocatechuic Acid Methyl Ester	Phenolic acids	Phenolic acids	2150-43-8	2	73408	68014	85943	80497	71043	68605	52632	74300	56756	56256	64194	61995	33335	66097	79408
MWSmce455	2	C9H10O4	Vanillic acid methyl ester	Phenolic acids	Phenolic acids	3943-74-6	3	15058	21877	20458	16976	12255	18025	13954	18306	11313	13444	13058	11234	80419	64202	72588
Zmhn001358	2	C13H16O8	4-O-Glucosyl-4-hydroxybenzoic acid*	Phenolic acids	Phenolic acids	-	1	3705600	3944400	4833700	4619600	4859000	2756400	2977700	3407500	2790700	3221100	2942500	3632700	11054000	10538000	9057200
pmn001419	2	C15H18O8	1-O-p-Coumaroyl-β-D-glucose	Phenolic acids	Phenolic acids	7139-64-2	1	6000800	5954000	5349700	7242700	5133900	5630500	4635000	4952900	4290600	4264500	5184500	5324300	2706800	2779600	2844700
Lmmn003663	2	C14H18O9	5-Glucosyloxy-2-Hydroxybenzoic acid methyl ester	Phenolic acids	Phenolic acids	-	2	699480	861970	623770	761610	593340	565270	564350	630020	524900	542600	512920	470510	362660	372190	397660
mws0906	2	C16H22O8	Coniferin	Phenolic acids	Phenolic acids	531-29-3	2	48253000	57086000	51677000	53099000	49867000	47658000	37033000	48031000	42141000	43878000	45720000	43377000	21577000	25183000	22460000
pmb3072	2	C22H26O12	3-O-p-Coumaroylshikimic acid-O-glucoside	Phenolic acids	Phenolic acids	-	3	36300	33307	32802	37415	27929	22717	34283	29990	9	30312	9	9	39658	55046	49136
pmb3061	2	C22H28O13	5-O-p-Coumaroylquinic acid O-glucoside	Phenolic acids	Phenolic acids	-	2	9538.9	9411.2	7890.1	11190	4844.8	8831.4	10645	9265.1	5352.9	7376.1	8321.7	6376	28645	29750	30286
Lmsn002288	2	C21H28O14	1-O-Caffeoyl-(6-O-glucosyl)-β-D-glucose	Phenolic acids	Phenolic acids	-	1	1099000	1208600	1574200	1288800	1018700	1070700	730740	1048100	795080	966430	891260	817540	379290	364580	418140
Lmmn002260	2	C27H36O12	5'-Methoxyisolariciresinol-9'-O-glucoside	Lignans and Coumarins	Lignans	-	2	149830	105800	122390	152730	52145	106630	94597	99921	71106	51325	102490	63331	178570	192100	196660
pmn001551	3	C21H22O9	Natsudaidain (3-Hydroxy-3',4',5,6,7,8-hexamethoxyflavone)	Flavonoids	Flavonols	35154-55-3	2	11407	12869	11213	10050	16720	21466	27223	26127	12614	24344	10856	16124	118640	95390	91412
mws1454	3	C23H26O11	Persicoside	Flavonoids	Flavanones	28978-03-2	3	9	9	9	9	24008	23756	15631	16307	15676	9	9	9	22152	15394	15851
pma6218	3	C21H22O9	O-MethylNaringenin-8-C-arabinoside	Flavonoids	Flavonoid carbonoside	-	3	71694	38333	51291	48679	83540	80532	73054	73358	83540	84460	59938	54057	63925	81996	39664
Lmnp002584	3	C28H32O16	Hispidulin-8-C-(2''-O-glucosyl)glucoside	Flavonoids	Flavonoid carbonoside	-	3	100860	86364	116000	75477	165220	162540	146810	185990	123900	155870	141180	162590	80049	92116	83452
HJAP026	3	C28H32O16	Chrysoeriol-6-C-glucoside-4'-O-glucoside	Flavonoids	Flavonoid carbonoside	-	3	119200	79173	114300	91589	169330	154820	165920	218600	118660	150040	192690	162590	85213	82155	68977
pmb2497	3	C9H10O5	4-Hydroxy-3-methoxymandelate	Phenolic acids	Phenolic acids	55-10-7	3	216830	206380	212140	169020	270060	253020	294800	279600	238360	238310	229100	228530	276470	310050	335370
Jmwn002620	3	C15H18O9	Vanillic Acid-4-O-Glucuronide	Phenolic acids	Phenolic acids	-	1	3859600	4002700	3843800	4480500	4834300	4691800	4163200	4735400	3538000	4950100	4334100	4257400	3068100	2611100	2950700
pmb0824	3	C25H28O13	Syringic acid-4-O-(6''-feruloyl)glucoside	Phenolic acids	Phenolic acids	-	3	34374	40381	57769	45094	85825	79242	88419	71269	87475	74494	63018	81220	42093	43266	34385
Cmqn003939	3	C34H46O18	liriodendrin;Syringaresinol-di-O-glucoside	Lignans and Coumarins	Lignans	573-44-4	2	15111	15011	12357	11811	16631	20087	24666	21027	23639	17825	18915	21434	64307	50884	64911
Lmdn004267	3	C20H22O6	Epipinoresinol*	Lignans and Coumarins	Lignans	24404-50-0	3	9	9	3654.8	9	5926.2	9234.9	6604.6	8232.4	4276.5	4201.8	4157.2	5413.2	39024	47759	44086
mws0097	3	C20H22O6	Pinoresinol*	Lignans and Coumarins	Lignans	487-36-5	3	9	9546.4	9	9	13190	6360.8	10406	10997	7990.6	8601.3	7264.3	6850.4	50460	49533	51411
pmp000577	4	C26H20O8	Acacetin-7-O-glucuronide	Flavonoids	Flavones	-	3	9	9	9	9	9	47920	9	9	45572	48674	51157	18743	19486	43573	35133
MWS20145	4	C21H22O11	Eriodictyol-7-O-glucoside	Flavonoids	Flavanones	38965-51-4	3	9	9	9	9	99292	100860	72615	89540	200590	87304	75058	82448	77928	83704	61207
mws0744	4	C15H12O8	Dihydromyricetin (Ampelopsin)	Flavonoids	Flavanonols	27200-12-0	3	9	9	9	9	9	9	9	9	10773	19062	25598	18103	146400	123920	136730
mws0034	4	C22H18O11	Epigallocatechin-3-gallate	Flavonoids	Flavanols	989-51-5	3	9131.7	9	9	9	12030	17820	9568.9	16689	7428.5	5005.9	59179	6869.3	21488	13838	15276
pmb0069	4	C7H7NO	Benzamide	Phenolic acids	Phenolic acids	55-21-0	3	924440	910520	961000	902200	1018100	993650	1007300	1043700	937770	1032100	970080	1210300	1008000	1082700	1063900
Lmbn001930	4	C7H6O2	2-Hydroxybenzaldehyde (Salicylaldehyde)	Phenolic acids	Phenolic acids	90-02-8	3	9	9	9	9	9	9	9	9	25435	8174.7	27557	25435	42140	38769	38367
mws1078	4	C7H7NO2	Anthranilic Acid	Phenolic acids	Phenolic acids	118-92-3	3	20871	9	9	9	9	9	9	9	41738	24665	58760	37944	60708	73038	55017
Hmsn002598	4	C13H18O8	Salirepin	Phenolic acids	Phenolic acids	26652-12-0	3	23388	29861	24063	33776	39041	29182	39812	44772	35970	47144	55912	52569	94557	125260	103060
Lmfp001509	4	C13H16O9	1-O-Galloyl-rhamnose	Phenolic acids	Phenolic acids	-	2	465920	431440	471540	447890	513880	574630	535200	618230	580870	578140	570060	595510	647690	621020	680710
pmn001695	4	C16H20O10	Trihydroxycinnamoylquinic acid	Phenolic acids	Phenolic acids	-	3	9	9	9	9	9	9	9	9	150510	159510	98912	137790	118270	104030	121690
pmb3066	4	C22H26O12	5-O-p-Coumaroylshikimic acid O-glucoside	Phenolic acids	Phenolic acids	-	3	35830	81890	100700	105920	109650	106450	119370	105700	131650	118070	134320	139260	278080	258490	284570
pmn001743	4	C31H42O17	Specnuezhenide	Phenolic acids	Phenolic acids	39011-92-2	2	160790	129230	163650	127530	242750	218990	192210	165440	235870	242030	235940	193680	309160	344480	338960
Hmln002355	4	C27H34O12	5'-Methoxymatairesinoside	Lignans and Coumarins	Lignans	1691201-82-7	3	163940	194150	181460	182530	174310	170050	179670	228330	221740	203310	194440	207910	341320	284010	299860
Rfmb26201	4	C30H38O14	Syringaresinol-4'-O-(6''-acetyl)glucoside	Lignans and Coumarins	Lignans	-	3	3173	9218.4	7586.5	14313	11096	12186	15609	17259	21826	14756	20524	21390	34315	28618	44751
MWSmce265	4	C14H14O4	Decursinol	Lignans and Coumarins	Coumarins	23458-02-8	3	9	9	9	9	14466	11821	26144	20280	23444	17455	27279	25267	28799	40057	44711
Lmbn001162	4	C15H16O9	Esculetin-7-O-glucoside	Lignans and Coumarins	Coumarins	-	2	292620	462820	367650	373390	551180	429700	451180	467840	592150	603730	548180	622960	198880	179040	195330
mws1015	4	C15H16O9	Esculin (6,7-DihydroxyCoumarin-6-glucoside)	Lignans and Coumarins	Coumarins	531-75-9	2	286920	450570	289860	400760	604490	464720	528870	440150	532100	547580	475260	545180	160090	193210	209710
Cmyn001328	4	C15H16O9	Daphnin	Lignans and Coumarins	Coumarins	486-55-5	2	272790	478580	382530	431880	504660	469950	491000	426900	522660	577010	535610	610960	218010	186080	194560
MWSHY0069	5	C16H12O6	Hispidulin (5,7,4'-Trihydroxy-6-methoxyflavone)	Flavonoids	Flavones	1447-88-7	1	230530	254570	280270	166050	223070	401050	435970	410100	128220	325260	132590	133460	1016100	964940	909830
Zmhp003514	5	C16H12O6	6,7,8-Tetrahydroxy-5-methoxyflavone	Flavonoids	Flavones	-	3	243060	292340	308370	161210	230580	415550	466600	438200	144820	326680	150980	138630	1055200	1043700	1084300
MWSHY0009	5	C16H12O6	Diosmetin (5,7,3'-Trihydroxy-4'-methoxyflavone)	Flavonoids	Flavones	520-34-3	1	211300	278260	244690	157420	222660	434910	448670	408210	137850	351030	139890	140880	989860	999490	925030
pmp000004	5	C17H14O7	4',5,7-Trihydroxy-3',6-dimethoxyflavone (Jaceosidin)	Flavonoids	Flavones	18085-97-7	3	9117.4	12772	8354.2	9791.1	23040	19055	22489	24840	5393.6	20359	6484	10827	61419	56977	60211
Lmdp002969	5	C21H20O13	Myricetin-3-O-galactoside	Flavonoids	Flavonols	15648-86-9	2	59446	49404	53204	40854	121830	59866	99354	45943	9	62704	9	9	87404	80807	98417
pme1662	5	C16H14O5	5,4'-Dihydroxy-7-methoxyflavanone (Sakuranetin)	Flavonoids	Flavanones	2957-21-3	3	9	9	9	9	3253.2	4447.5	2412.2	3473.8	9	9	9	9	9295.5	6460.7	7476.4
Lmsn003297	5	C21H22O11	3,4,2',4',6'-Pentahydroxychalcone-4'-O-glucoside	Flavonoids	Chalcones	-	2	9	9	9	9	73956	79851	186840	90568	9	9	9	9	159620	181670	204710
pme2828	5	C6H5NO3	4-Nitrophenol	Phenolic acids	Phenolic acids	100-02-7	3	7849100	7119600	7017100	6219400	8476200	8102700	8808700	7065300	7209500	7075400	6512200	6971900	9699800	8812400	10825000
Zmgn004894	5	C8H8O3	Methyl 4-hydroxybenzoate	Phenolic acids	Phenolic acids	99-76-3	3	22500	20063	14999	26268	21295	20385	31186	26919	9	23065	9	9	42710	39734	52181
Lmhn003074	5	C14H14O8	Feruloylmalic acid	Phenolic acids	Phenolic acids	-	3	54532	54207	68139	62933	54352	58209	77979	80425	51003	42292	46145	42694	177070	194700	164140
Zmhn001883	5	C14H18O9	Vanillic acid-4-O-glucoside	Phenolic acids	Phenolic acids	32142-31-7	2	5877500	6764500	6754100	8025300	6021600	7238100	7485700	7465500	4627500	6178400	5077100	5507400	15308000	16862000	15800000
Lmtn002324	5	C19H28O11	Benzyl-(2''-O-glucosyl)glucoside*	Phenolic acids	Phenolic acids	-	1	12444	24981	10599	22700	31104	34437	36371	38817	19978	17249	9	28312	98908	99845	78967
Lmyn006227	6	C15H10O5	Galangin (3,5,7-Trihydroxyflavone)	Flavonoids	Flavones	548-83-4	3	8471.1	8987.3	9196.7	9078.5	6345.6	6106	3465.5	7495.3	11248	16694	5844.7	5213.7	6170.8	7033.6	5610.9
Lmtp002942	6	C25H26O13	Apigenin-6,8-di-C-arabinoside*	Flavonoids	Flavonoid carbonoside	-	2	95667	72429	66858	103070	57984	76192	46554	68443	103850	101090	82612	76994	52492	46286	42776
mws1292	6	C26H28O14	Isoschaftoside	Flavonoids	Flavonoid carbonoside	52012-29-0	1	1402300	1429400	1184200	1771000	1100200	1068400	871090	1164100	1615400	2054200	1531300	1241800	630800	846560	820710
Lmtp002474	6	C26H28O14	Apigenin-6-C-(2''-glucosyl)arabinoside	Flavonoids	Flavonoid carbonoside	-	1	2142000	2199400	1933900	2645500	2081900	1984700	1432200	1570900	2022000	2610200	2349300	2328900	1124300	2430400	1318900
Lmnp102580	6	C26H28O14	Apigenin-6-C-(2''-xylosyl)glucoside	Flavonoids	Flavonoid carbonoside	-	3	680530	644280	505870	804110	9	9	9	9	562070	642630	701810	679700	315300	308960	392710
pmn001367	6	C13H16O9	Protocatechuic acid-4-O-glucoside	Phenolic acids	Phenolic acids	-	2	3787000	3830000	3576600	4086400	2829300	3023100	3192700	3324500	2756100	3453800	4296300	4609000	1871200	2024100	1973000

[truncated: 1 more sheets: Table S7]
